# Supplementary material for: Signature of seven cuproptosis-related lncRNAs as a novel biomarker to predict prognosis and therapeutic response in cervical cancer
Source: Front Genet. 2022 Sep 20;13:989646. doi: 10.3389/fgene.2022.989646 (PMC9530991; doi:10.3389/fgene.2022.989646)
Supplement: Supplementary file 12 [file Table7.XLSX]

## Sheet: Annotation
MyList	Gene ID	Type	Tax ID	Homologene Gene ID	Homologene Gene Tax ID	Gene Symbol	Description	Biological Process (GO)	Kinase Class (UniProt)	Protein Function (Protein Atlas)	Subcellular Location (Protein Atlas)	Drug (DrugBank)	Canonical Pathways	Hallmark Gene Sets	GO:0001819 positive regulation of cytokin	hsa04640 Hematopoietic cell lineage	GO:0022409 positive regulation of cell-ce	M5885 NABA MATRISOME ASSOCIATED	GO:0060135 maternal process involved in f	GO:0032103 positive regulation of respons	GO:0045471 response to ethanol	hsa04514 Cell adhesion molecules	GO:0048608 reproductive structure develop	GO:0052547 regulation of peptidase activi	GO:0030855 epithelial cell differentiatio	GO:0030900 forebrain development	GO:0007159 leukocyte cell-cell adhesion	M5884 NABA CORE MATRISOME	GO:0010817 regulation of hormone levels	GO:0060284 regulation of cell development	GO:0009410 response to xenobiotic stimulu	R-HSA-198933 Immunoregulatory interactions	GO:0007423 sensory organ development	GO:0051384 response to glucocorticoid
NTRK2	4915	symbol	H. sapiens	4915	H. sapiens	NTRK2	neurotrophic receptor tyrosine kinase 2	GO:0099540 trans-synaptic signaling by neuropeptide;GO:0099551 trans-synaptic signaling by neuropeptide, modulating synaptic transmission;GO:0099538 synaptic signaling via neuropeptide	Tyr protein kinase family	Human disease related genes:Nervous system diseases:Epilepsy; RAS pathway related proteins; ENZYME proteins:Transferases; Disease related genes; Human disease related genes:Cancers:Cancers of eye, brain, and central nervous system; Cancer-related genes:Candidate cancer biomarkers; Kinases:Tyr protein kinases; Enzymes; FDA approved drug targets:Small molecule drugs	Plasma membrane (Supported)	Amitriptyline; Esketamine; Entrectinib; Fostamatinib; Larotrectinib	(M142)PID AJDISS 2PATHWAY; (M100)PID SHP2 PATHWAY; (M187)PID TRKR PATHWAY		0	1	1	1	0	0	0	0	1	0	0	1	0	0	1	1	0	0	1	0
CCL5	6352	symbol	H. sapiens	6352	H. sapiens	CCL5	C-C motif chemokine ligand 5	GO:2000503 positive regulation of natural killer cell chemotaxis;GO:0031584 activation of phospholipase D activity;GO:0033634 positive regulation of cell-cell adhesion mediated by integrin		Predicted secreted proteins; Human disease related genes:Skin diseases:Skin and soft tissue diseases; Cancer-related genes:Candidate cancer biomarkers; Human disease related genes:Immune system diseases:Allergies and autoimmune diseases		Heparin Disaccharide I-S; Heparin Disaccharide Iii-S	(M165)PID SYNDECAN 4 PATHWAY; (M198)PID SYNDECAN 1 PATHWAY; (M254)PID MYC REPRESS PATHWAY	(M5890)HALLMARK TNFA SIGNALING VIA NFKB; (M5913)HALLMARK INTERFERON GAMMA RESPONSE; (M5921)HALLMARK COMPLEMENT	0	1	1	1	0	1	1	0	0	0	0	0	1	0	1	0	0	1	0	1
SLC7A5	8140	symbol	H. sapiens	8140	H. sapiens	SLC7A5	solute carrier family 7 member 5	GO:0015823 phenylalanine transport;GO:1904556 L-tryptophan transmembrane transport;GO:0098713 leucine import across plasma membrane		Transporters:Electrochemical Potential-driven transporters	Cytosol;Plasma membrane (Supported); Additional: Vesicles			(M5922)HALLMARK UNFOLDED PROTEIN RESPONSE; (M5901)HALLMARK G2M CHECKPOINT; (M5906)HALLMARK ESTROGEN RESPONSE EARLY	1	0	1	0	0	1	0	0	0	0	0	0	1	0	1	0	1	0	0	0
NIPAL1	152519	symbol	H. sapiens	152519	H. sapiens	NIPAL1	NIPA like domain containing 1	GO:1903830 magnesium ion transmembrane transport;GO:0015693 magnesium ion transport;GO:0098662 inorganic cation transmembrane transport			Golgi apparatus (Approved)				0	0	0	0	0	0	0	0	0	0	0	0	0	0	0	0	0	0	0	0
IL1B	3553	symbol	H. sapiens	3553	H. sapiens	IL1B	interleukin 1 beta	GO:1903597 negative regulation of gap junction assembly;GO:0035504 regulation of myosin light chain kinase activity;GO:0035505 positive regulation of myosin light chain kinase activity		Predicted intracellular proteins; Human disease related genes:Immune system diseases:Allergies and autoimmune diseases; Transporters:Transporter channels and pores; Predicted secreted proteins; Candidate cardiovascular disease genes; Cancer-related genes:Candidate cancer biomarkers; Human disease related genes:Skin diseases:Skin and soft tissue diseases; FDA approved drug targets:Small molecule d…		Donepezil; Minocycline; VP025; Gallium nitrate; Talmapimod; Etiprednol dicloacetate; VX-702; VX-765; Andrographolide; Canakinumab; Rilonacept; Foreskin keratinocyte (neonatal); Binimetinib; Gevokizumab; Dilmapimod	(M11736)SA MMP CYTOKINE CONNECTION; (M267)PID ANTHRAX PATHWAY; (M36)PID IL27 PATHWAY	(M5897)HALLMARK IL6 JAK STAT3 SIGNALING; (M5902)HALLMARK APOPTOSIS; (M5890)HALLMARK TNFA SIGNALING VIA NFKB	1	1	1	1	1	1	1	0	0	1	0	0	1	0	1	1	1	1	0	1
LRRC15	131578	symbol	H. sapiens	131578	H. sapiens	LRRC15	leucine rich repeat containing 15	GO:0046813 receptor-mediated virion attachment to host cell;GO:0019062 virion attachment to host cell;GO:0044650 adhesion of symbiont to host cell		Transporters:Accessory Factors Involved in Transport	Vesicles (Approved); Additional: Plasma membrane			(M5930)HALLMARK EPITHELIAL MESENCHYMAL TRANSITION	0	0	1	0	0	0	0	0	0	0	0	0	0	0	0	0	0	0	0	0
TIMP3	7078	symbol	H. sapiens	7078	H. sapiens	TIMP3	TIMP metallopeptidase inhibitor 3	GO:1903984 positive regulation of TRAIL-activated apoptotic signaling pathway;GO:1903121 regulation of TRAIL-activated apoptotic signaling pathway;GO:0051045 negative regulation of membrane protein ectodomain proteolysis		Disease related genes; Predicted secreted proteins; Cancer-related genes:Candidate cancer biomarkers; Human disease related genes:Nervous system diseases:Eye disease	Vesicles (Approved); Additional: Golgi apparatus	Pimagedine	(M3468)NABA ECM REGULATORS; (M5885)NABA MATRISOME ASSOCIATED; (M5889)NABA MATRISOME	(M5946)HALLMARK COAGULATION; (M5902)HALLMARK APOPTOSIS; (M5930)HALLMARK EPITHELIAL MESENCHYMAL TRANSITION	0	1	1	1	0	0	0	0	0	1	0	0	1	0	1	0	0	0	0	1
FBN2	2201	symbol	H. sapiens	2201	H. sapiens	FBN2	fibrillin 2	GO:0035583 sequestering of TGFbeta in extracellular matrix;GO:0060346 bone trabecula formation;GO:0071694 maintenance of protein location in extracellular region		Human disease related genes:Congenital malformations:Other congenital malformations; Human disease related genes:Congenital malformations:Congenital malformations of the musculoskeletal system; Predicted secreted proteins; Disease related genes; Cancer-related genes:Mutational cancer driver genes; Predicted intracellular proteins	Cytosol (Approved); Additional: Nucleoplasm	Calcium citrate; Calcium Phosphate; Calcium phosphate dihydrate	(M3008)NABA ECM GLYCOPROTEINS; (M5884)NABA CORE MATRISOME; (M5889)NABA MATRISOME	(M5930)HALLMARK EPITHELIAL MESENCHYMAL TRANSITION	0	0	0	0	0	0	0	0	0	0	0	1	0	1	0	0	0	0	1	0
SLC10A6	345274	symbol	H. sapiens	345274	H. sapiens	SLC10A6	solute carrier family 10 member 6	GO:0043251 sodium-dependent organic anion transport;GO:0015721 bile acid and bile salt transport;GO:0015718 monocarboxylic acid transport		Transporters:Electrochemical Potential-driven transporters					0	1	0	0	0	0	0	0	0	0	0	0	0	0	0	0	0	0	0	0
ALDH3A1	218	symbol	H. sapiens	218	H. sapiens	ALDH3A1	aldehyde dehydrogenase 3 family member A1	GO:0006081 cellular aldehyde metabolic process;GO:0006805 xenobiotic metabolic process;GO:0071466 cellular response to xenobiotic stimulus		ENZYME proteins:Oxidoreductases; Predicted intracellular proteins; Enzymes	Cytosol;Plasma membrane (Supported); Additional: Nucleoplasm;Vesicles	NADH		(M5935)HALLMARK FATTY ACID METABOLISM; (M5934)HALLMARK XENOBIOTIC METABOLISM	0	0	0	0	0	0	0	0	0	0	0	0	0	0	0	0	1	0	0	0
SERPINB7	8710	symbol	H. sapiens	8710	H. sapiens	SERPINB7	serpin family B member 7	GO:0090362 positive regulation of platelet-derived growth factor production;GO:0090361 regulation of platelet-derived growth factor production;GO:0072126 positive regulation of glomerular mesangial cell proliferation		Disease related genes; Human disease related genes:Congenital malformations:Congenital malformations of skin; Predicted intracellular proteins	Endoplasmic reticulum (Approved); Additional: Mitochondria		(M3468)NABA ECM REGULATORS; (M5885)NABA MATRISOME ASSOCIATED; (M5889)NABA MATRISOME		1	0	0	1	0	0	0	0	0	1	0	0	0	0	0	0	0	0	0	0
DMRT2	10655	symbol	H. sapiens	10655	H. sapiens	DMRT2	doublesex and mab-3 related transcription factor 2	GO:2000287 positive regulation of myotome development;GO:2000290 regulation of myotome development;GO:0014807 regulation of somitogenesis		Transcription factors:Zinc-coordinating DNA-binding domains; Predicted intracellular proteins	Nucleoli;Nucleoplasm (Approved); Additional: Centriolar satellite;Vesicles				0	0	0	0	0	0	0	0	1	0	0	0	0	0	0	0	0	0	0	0
HEPHL1	341208	symbol	H. sapiens	341208	H. sapiens	HEPHL1	hephaestin like 1	GO:0006825 copper ion transport;GO:0006826 iron ion transport;GO:0006879 cellular iron ion homeostasis		Disease related genes; ENZYME proteins:Oxidoreductases; Potential drug targets; Enzymes; Transporters:Accessory Factors Involved in Transport		Copper			0	0	0	0	0	0	0	0	0	0	0	0	0	0	0	0	0	0	0	0
VCAN	1462	symbol	H. sapiens	1462	H. sapiens	VCAN	versican	GO:0001649 osteoblast differentiation;GO:0008037 cell recognition;GO:0001503 ossification		Disease related genes; Predicted intracellular proteins; Predicted secreted proteins; Human disease related genes:Nervous system diseases:Eye disease	Vesicles (Approved)	Hyaluronic acid	(M264)PID TOLL ENDOGENOUS PATHWAY; (M5882)NABA PROTEOGLYCANS; (M223)PID BETA CATENIN NUC PATHWAY	(M5944)HALLMARK ANGIOGENESIS; (M5915)HALLMARK APICAL JUNCTION; (M5930)HALLMARK EPITHELIAL MESENCHYMAL TRANSITION	0	1	0	0	0	0	1	1	0	0	0	1	0	1	0	0	0	0	0	0
TPSAB1	7177	symbol	H. sapiens	7177	H. sapiens	TPSAB1	tryptase alpha/beta 1	GO:0022617 extracellular matrix disassembly;GO:0030198 extracellular matrix organization;GO:0043062 extracellular structure organization		Peptidases:Serine-type peptidases; ENZYME proteins:Hydrolases; Predicted secreted proteins; Disease related genes; Potential drug targets; Enzymes		Amido Phenyl Pyruvic Acid; 4-PIPERIDIN-4-YLBUTANAL; [4-(3-AMINOMETHYL-PHENYL)-PIPERIDIN-1-YL]-(5-PHENETHYL- PYRIDIN-3-YL)-METHANONE; 1-(1'-{[3-(methylsulfanyl)-2-benzothiophen-1-yl]carbonyl}spiro[1-benzofuran-3,4'-piperidin]-5-yl)methanamine; 1-[1'-(3-phenylacryloyl)spiro[1-benzofuran-3,4'-piperidin]-5-yl]methanamine; JNJ-27390467		(M5907)HALLMARK ESTROGEN RESPONSE LATE	0	0	1	0	0	0	0	0	0	0	0	0	0	1	0	0	0	0	0	0
RIMS3	9783	symbol	H. sapiens	9783	H. sapiens	RIMS3	regulating synaptic membrane exocytosis 3	GO:0048791 calcium ion-regulated exocytosis of neurotransmitter;GO:0017156 calcium-ion regulated exocytosis;GO:2000300 regulation of synaptic vesicle exocytosis		Predicted intracellular proteins	Mitochondria;Nucleoli (Approved); Additional: Nucleoplasm				0	0	1	0	0	0	0	0	0	0	0	0	0	0	1	1	0	0	0	0
RAET1E	135250	symbol	H. sapiens	135250	H. sapiens	RAET1E	retinoic acid early transcript 1E	GO:0045954 positive regulation of natural killer cell mediated cytotoxicity;GO:0042267 natural killer cell mediated cytotoxicity;GO:0002717 positive regulation of natural killer cell mediated immunity		Predicted intracellular proteins	Focal adhesion sites (Supported); Additional: Cytosol				0	0	0	0	0	1	0	1	0	0	0	0	0	0	0	0	0	1	0	0
STC1	6781	symbol	H. sapiens	6781	H. sapiens	STC1	stanniocalcin 1	GO:0003421 growth plate cartilage axis specification;GO:1903403 negative regulation of renal phosphate excretion;GO:0003422 growth plate cartilage morphogenesis		Predicted intracellular proteins; Predicted secreted proteins				(M5944)HALLMARK ANGIOGENESIS; (M5891)HALLMARK HYPOXIA; (M5924)HALLMARK MTORC1 SIGNALING	0	1	1	1	1	0	0	0	1	0	1	1	0	0	0	0	0	0	0	1
TGFA	7039	symbol	H. sapiens	7039	H. sapiens	TGFA	transforming growth factor alpha	GO:0038134 ERBB2-EGFR signaling pathway;GO:0072574 hepatocyte proliferation;GO:0072575 epithelial cell proliferation involved in liver morphogenesis		RAS pathway related proteins; Human disease related genes:Cancers:Cancers of the digestive system; Predicted secreted proteins; Cancer-related genes:Candidate cancer biomarkers	Vesicles (Approved)		(M201)PID ERBB NETWORK PATHWAY; (M176)PID FOXM1 PATHWAY; (M145)PID P53 DOWNSTREAM PATHWAY	(M5937)HALLMARK GLYCOLYSIS; (M5939)HALLMARK P53 PATHWAY	0	0	1	1	0	0	0	0	0	0	0	1	0	0	0	0	1	0	0	0
MATN3	4148	symbol	H. sapiens	4148	H. sapiens	MATN3	matrilin 3	GO:0051216 cartilage development;GO:0061448 connective tissue development;GO:0030198 extracellular matrix organization		Disease related genes; Predicted secreted proteins; Human disease related genes:Congenital malformations:Congenital malformations of the musculoskeletal system	Endoplasmic reticulum;Golgi apparatus (Approved)		(M3008)NABA ECM GLYCOPROTEINS; (M5884)NABA CORE MATRISOME; (M5889)NABA MATRISOME	(M5930)HALLMARK EPITHELIAL MESENCHYMAL TRANSITION	0	0	0	0	0	0	0	0	0	0	0	0	0	1	0	0	0	0	0	0
BASP1	10409	symbol	H. sapiens	10409	H. sapiens	BASP1	brain abundant membrane attached signal protein 1	GO:2001074 regulation of metanephric ureteric bud development;GO:2001076 positive regulation of metanephric ureteric bud development;GO:0007356 thorax and anterior abdomen determination		Predicted intracellular proteins; Transporters:Transporter channels and pores	Plasma membrane (Enhanced)			(M5930)HALLMARK EPITHELIAL MESENCHYMAL TRANSITION	0	0	0	0	0	0	0	0	1	0	1	1	0	0	0	0	0	0	0	0
PGBD5	79605	symbol	H. sapiens	79605	H. sapiens	PGBD5	piggyBac transposable element derived 5	GO:0098038 non-replicative transposition, DNA-mediated;GO:0006313 transposition, DNA-mediated;GO:0032196 transposition		Disease related genes; Predicted intracellular proteins	Nucleoplasm (Supported)				0	0	0	0	0	0	0	0	0	0	0	0	0	0	0	0	0	0	0	0
ALDH1A3	220	symbol	H. sapiens	220	H. sapiens	ALDH1A3	aldehyde dehydrogenase 1 family member A3	GO:0021768 nucleus accumbens development;GO:0060166 olfactory pit development;GO:0070384 Harderian gland development		Predicted intracellular proteins; Human disease related genes:Congenital malformations:Congenital malformations of eye; Disease related genes; ENZYME proteins:Oxidoreductases; Potential drug targets; Enzymes	Nucleoplasm (Supported); Additional: Cytosol	NADH; Vitamin A		(M5908)HALLMARK ANDROGEN RESPONSE; (M5953)HALLMARK KRAS SIGNALING UP	0	0	0	1	0	0	0	0	0	0	0	1	0	0	1	0	0	0	1	0
DMRTA2	63950	symbol	H. sapiens	63950	H. sapiens	DMRTA2	DMRT like family A2	GO:0021796 cerebral cortex regionalization;GO:0021978 telencephalon regionalization;GO:0021871 forebrain regionalization		Transcription factors:Zinc-coordinating DNA-binding domains; Predicted intracellular proteins	Mitochondria (Approved); Additional: Nucleoplasm				0	0	0	0	0	0	0	0	1	0	0	1	0	0	0	1	0	0	0	0
WNT3A	89780	symbol	H. sapiens	89780	H. sapiens	WNT3A	Wnt family member 3A	GO:0003136 negative regulation of heart induction by canonical Wnt signaling pathway;GO:0009997 negative regulation of cardioblast cell fate specification;GO:0042686 regulation of cardioblast cell fate specification		Predicted secreted proteins	Vesicles (Approved)		(M31)PID BETA CATENIN DEG PATHWAY; (M90)PID WNT CANONICAL PATHWAY; (M77)PID WNT SIGNALING PATHWAY		1	1	1	1	0	0	0	0	0	1	0	1	1	0	0	1	0	1	1	0
INHBA	3624	symbol	H. sapiens	3624	H. sapiens	INHBA	inhibin subunit beta A	GO:0042701 progesterone secretion;GO:0046882 negative regulation of follicle-stimulating hormone secretion;GO:0060279 positive regulation of ovulation		Predicted secreted proteins; Cancer-related genes:Candidate cancer biomarkers; Candidate cardiovascular disease genes			(M185)PID ALK1 PATHWAY; (M5883)NABA SECRETED FACTORS; (M5885)NABA MATRISOME ASSOCIATED	(M5890)HALLMARK TNFA SIGNALING VIA NFKB; (M5930)HALLMARK EPITHELIAL MESENCHYMAL TRANSITION; (M5932)HALLMARK INFLAMMATORY RESPONSE	1	1	1	1	0	0	1	0	1	0	1	1	0	0	1	1	1	1	1	1
GSTA1	2938	symbol	H. sapiens	2938	H. sapiens	GSTA1	glutathione S-transferase alpha 1	GO:1901685 glutathione derivative metabolic process;GO:1901687 glutathione derivative biosynthetic process;GO:0043651 linoleic acid metabolic process		ENZYME proteins:Transferases; Predicted intracellular proteins; Enzymes	Cytosol (Supported)	Glutathione; S-Hydroxycysteine; 2-Hydroxyethyl Disulfide; N-(4-Aminobutanoyl)-S-(4-methoxybenzyl)-L-cysteinylglycine; Glutathione sulfonic acid; Glutathione disulfide; S-benzylglutathione; S-Hexylglutathione; Hypericin			0	0	0	1	0	0	0	0	0	0	1	0	0	0	0	0	1	0	0	0
SP6	80320	symbol	H. sapiens	80320	H. sapiens	SP6	Sp6 transcription factor	GO:0042481 regulation of odontogenesis;GO:2000027 regulation of animal organ morphogenesis;GO:0022603 regulation of anatomical structure morphogenesis		Transcription factors:Zinc-coordinating DNA-binding domains; Predicted intracellular proteins	Nucleoplasm (Supported); Additional: Centrosome;Mitotic spindle				0	0	0	0	0	0	0	0	0	0	0	0	0	0	0	0	0	0	0	0
ESM1	11082	symbol	H. sapiens	11082	H. sapiens	ESM1	endothelial cell specific molecule 1	GO:1902204 positive regulation of hepatocyte growth factor receptor signaling pathway;GO:1902202 regulation of hepatocyte growth factor receptor signaling pathway;GO:0002040 sprouting angiogenesis		Predicted secreted proteins			(M5882)NABA PROTEOGLYCANS; (M5884)NABA CORE MATRISOME; (M5889)NABA MATRISOME		0	0	0	1	0	0	0	0	0	0	0	0	0	1	0	0	0	0	0	0
EREG	2069	symbol	H. sapiens	2069	H. sapiens	EREG	epiregulin	GO:0038135 ERBB2-ERBB4 signaling pathway;GO:0042700 luteinizing hormone signaling pathway;GO:0048160 primary follicle stage		Human disease related genes:Cancers:Cancers of the digestive system; Predicted secreted proteins	Vesicles (Approved)		(M201)PID ERBB NETWORK PATHWAY; (M13)PID ERBB4 PATHWAY; (M5883)NABA SECRETED FACTORS	(M5902)HALLMARK APOPTOSIS; (M5932)HALLMARK INFLAMMATORY RESPONSE; (M5950)HALLMARK ALLOGRAFT REJECTION	1	1	1	1	0	1	0	0	1	0	1	1	0	0	0	1	0	0	0	1
AGR3	155465	symbol	H. sapiens	155465	H. sapiens	AGR3	anterior gradient 3, protein disulphide isomerase family member	GO:0060548 negative regulation of cell death;GO:0010941 regulation of cell death;GO:0048523 negative regulation of cellular process		Predicted intracellular proteins	Endoplasmic reticulum (Supported); Additional: Vesicles				0	0	0	0	0	0	0	0	0	0	0	0	0	0	0	0	0	0	0	0
RNF128	79589	symbol	H. sapiens	79589	H. sapiens	RNF128	ring finger protein 128	GO:1904352 positive regulation of protein catabolic process in the vacuole;GO:1904350 regulation of protein catabolic process in the vacuole;GO:0061462 protein localization to lysosome		ENZYME proteins:Transferases; Enzymes			(M60)PID NFAT TFPATHWAY		0	0	0	0	0	0	0	0	0	0	0	0	0	0	0	0	0	0	0	0
TMEM116	89894	symbol	H. sapiens	89894	H. sapiens	TMEM116	transmembrane protein 116	GO:0007189 adenylate cyclase-activating G protein-coupled receptor signaling pathway;GO:0007188 adenylate cyclase-modulating G protein-coupled receptor signaling pathway;GO:0007186 G protein-coupled receptor signaling pathway		Predicted intracellular proteins	Microtubules (Approved); Additional: Nucleoplasm				0	0	0	0	0	0	0	0	0	0	0	0	0	0	0	0	0	0	0	0
CXCR6	10663	symbol	H. sapiens	10663	H. sapiens	CXCR6	C-X-C motif chemokine receptor 6	GO:0019079 viral genome replication;GO:0070098 chemokine-mediated signaling pathway;GO:1990868 response to chemokine		G-protein coupled receptors:Chemokines and chemotactic factors receptors; G-protein coupled receptors:GPCRs excl olfactory receptors; CD markers				(M5932)HALLMARK INFLAMMATORY RESPONSE	0	1	1	0	0	0	0	0	0	0	0	0	0	0	0	0	0	0	0	0
GPR157	80045	symbol	H. sapiens	80045	H. sapiens	GPR157	G protein-coupled receptor 157	GO:0060019 radial glial cell differentiation;GO:0048512 circadian behavior;GO:0007622 rhythmic behavior		G-protein coupled receptors:GPCRs excl olfactory receptors; G-protein coupled receptors:Family 2 (B) receptors	Nucleoli;Nucleoli rim (Uncertain); Additional: Cell Junctions;Plasma membrane				0	1	0	0	0	0	0	0	1	0	0	0	0	0	0	0	0	0	0	0
BCAT1	586	symbol	H. sapiens	586	H. sapiens	BCAT1	branched chain amino acid transaminase 1	GO:0009098 leucine biosynthetic process;GO:0009099 valine biosynthetic process;GO:0009082 branched-chain amino acid biosynthetic process		ENZYME proteins:Transferases; Predicted intracellular proteins; Enzymes		Pyridoxal phosphate; Glutamic acid; Leucine; Valine; Isoleucine; N'-(5-CHLOROBENZOFURAN-2-CARBONYL)-2-(TRIFLUOROMETHYL)BENZENESULFONOHYDRAZIDE	(M66)PID MYC ACTIV PATHWAY	(M5924)HALLMARK MTORC1 SIGNALING; (M5934)HALLMARK XENOBIOTIC METABOLISM; (M5950)HALLMARK ALLOGRAFT REJECTION	0	0	0	0	0	0	0	0	0	0	0	0	0	0	0	0	0	0	0	0
AQP1	358	symbol	H. sapiens	358	H. sapiens	AQP1	aquaporin 1 (Colton blood group)	GO:0035378 carbon dioxide transmembrane transport;GO:0030950 establishment or maintenance of actin cytoskeleton polarity;GO:0033326 cerebrospinal fluid secretion		Blood group antigen proteins; Transporters:Transporter channels and pores	Plasma membrane (Supported)	Acetazolamide; B-nonylglucoside; Mersalyl			0	1	1	1	0	0	0	0	0	1	0	1	0	0	1	0	0	0	0	1
OLR1	4973	symbol	H. sapiens	4973	H. sapiens	OLR1	oxidized low density lipoprotein receptor 1	GO:0007159 leukocyte cell-cell adhesion;GO:0042157 lipoprotein metabolic process;GO:0008015 blood circulation		Disease related genes; Predicted intracellular proteins	Nucleoplasm;Plasma membrane (Approved); Additional: Vesicles			(M5944)HALLMARK ANGIOGENESIS; (M5946)HALLMARK COAGULATION; (M5890)HALLMARK TNFA SIGNALING VIA NFKB	0	0	1	0	0	0	0	0	0	0	0	0	1	0	0	0	0	0	0	0
CASP14	23581	symbol	H. sapiens	23581	H. sapiens	CASP14	caspase 14	GO:0070268 cornification;GO:0097194 execution phase of apoptosis;GO:0031424 keratinization		Human disease related genes:Congenital malformations:Congenital malformations of skin; Predicted intracellular proteins; Peptidases:Cysteine-type peptidases; Disease related genes; Potential drug targets; Enzymes	Cytosol;Nucleoplasm (Supported); Additional: Mitochondria				0	0	0	0	0	0	0	0	0	0	1	0	0	0	0	0	0	0	0	0
F3	2152	symbol	H. sapiens	2152	H. sapiens	F3	coagulation factor III, tissue factor	GO:0002541 activation of plasma proteins involved in acute inflammatory response;GO:0002543 activation of blood coagulation via clotting cascade;GO:0010641 positive regulation of platelet-derived growth factor receptor signaling pathway		Predicted secreted proteins; Candidate cardiovascular disease genes; CD markers; Cancer-related genes:Candidate cancer biomarkers; Predicted intracellular proteins; Transporters:Accessory Factors Involved in Transport; FDA approved drug targets:Biotech drugs	Vesicles (Approved)	Coagulation factor VIIa Recombinant Human; rNAPc2; 2-(4-HYDROXY-5-PHENYL-1H-PYRAZOL-3-YL)-1H-BENZOIMIDAZOLE-5-CARBOXAMIDINE; [2'-HYDROXY-3'-(1H-PYRROLO[3,2-C]PYRIDIN-2-YL)-BIPHENYL-3-YLMETHYL]-UREA; [5-(5-Amino-1H-pyrrolo[3,2-b]pyridin-2-yl)-6-hydroxy-3'-nitro-3-biphenylyl]acetic acid; Coagulation factor VII human		(M5946)HALLMARK COAGULATION; (M5942)HALLMARK UV RESPONSE DN; (M5890)HALLMARK TNFA SIGNALING VIA NFKB	1	1	1	1	0	1	0	0	0	1	0	0	1	0	0	0	0	0	0	0
PCDHGC3	5098	symbol	H. sapiens	5098	H. sapiens	PCDHGC3	protocadherin gamma subfamily C, 3	GO:0016339 calcium-dependent cell-cell adhesion via plasma membrane cell adhesion molecules;GO:0043524 negative regulation of neuron apoptotic process;GO:0007156 homophilic cell adhesion via plasma membrane adhesion molecules		Predicted intracellular proteins	Plasma membrane (Approved)				0	0	0	0	0	0	0	0	0	0	0	0	1	0	0	0	0	0	0	0
SPRY4	81848	symbol	H. sapiens	81848	H. sapiens	SPRY4	sprouty RTK signaling antagonist 4	GO:0010771 negative regulation of cell morphogenesis involved in differentiation;GO:1900025 negative regulation of substrate adhesion-dependent cell spreading;GO:0040037 negative regulation of fibroblast growth factor receptor signaling pathway		Disease related genes; Predicted intracellular proteins; Human disease related genes:Endocrine and metabolic diseases:Hypothalamus and pituitary gland diseases	Golgi apparatus (Approved); Additional: Cytosol			(M5947)HALLMARK IL2 STAT5 SIGNALING	0	0	1	1	0	0	0	0	0	0	0	0	0	0	0	1	0	0	0	0
FAM3B	54097	symbol	H. sapiens	54097	H. sapiens	FAM3B	FAM3 metabolism regulating signaling molecule B	GO:0030073 insulin secretion;GO:0030072 peptide hormone secretion;GO:0002790 peptide secretion		Predicted intracellular proteins; Predicted secreted proteins	Vesicles (Approved)				0	0	0	0	0	0	0	0	0	0	0	0	0	0	1	0	0	0	0	0
FNDC1	84624	symbol	H. sapiens	84624	H. sapiens	FNDC1	fibronectin type III domain containing 1			Predicted intracellular proteins; Predicted secreted proteins	Nuclear speckles (Approved)		(M3008)NABA ECM GLYCOPROTEINS; (M5884)NABA CORE MATRISOME; (M5889)NABA MATRISOME		0	0	0	0	0	0	0	0	0	0	0	0	0	1	0	0	0	0	0	0
ADCY7	113	symbol	H. sapiens	113	H. sapiens	ADCY7	adenylate cyclase 7	GO:0006171 cAMP biosynthetic process;GO:0071285 cellular response to lithium ion;GO:0071361 cellular response to ethanol		Predicted intracellular proteins; ENZYME proteins:Lyases; Enzymes	Cytosol (Approved)		(M56)PID LPA4 PATHWAY; (M8)PID ENDOTHELIN PATHWAY; (M15)PID LYSOPHOSPHOLIPID PATHWAY		0	0	0	1	1	0	1	0	0	0	0	0	0	0	0	0	0	0	0	1
CHST7	56548	symbol	H. sapiens	56548	H. sapiens	CHST7	carbohydrate sulfotransferase 7	GO:0006044 N-acetylglucosamine metabolic process;GO:0030206 chondroitin sulfate biosynthetic process;GO:0050650 chondroitin sulfate proteoglycan biosynthetic process		ENZYME proteins:Transferases; Predicted intracellular proteins; Enzymes	Nucleoplasm;Vesicles (Approved)				0	0	0	0	0	0	0	0	0	0	0	0	0	0	0	0	0	0	0	0
CPS1	1373	symbol	H. sapiens	1373	H. sapiens	CPS1	carbamoyl-phosphate synthase 1	GO:0070408 carbamoyl phosphate metabolic process;GO:0070409 carbamoyl phosphate biosynthetic process;GO:0071400 cellular response to oleic acid		Predicted intracellular proteins; Human disease related genes:Congenital disorders of metabolism:Congenital disorders of amino acid metabolism; Disease related genes; ENZYME proteins:Ligase; Enzymes; FDA approved drug targets:Small molecule drugs	Nucleoli;Nucleoli rim (Supported)	Carglumic acid			0	0	1	1	0	0	0	0	0	0	1	1	0	0	0	0	1	0	0	1
CLDN3	1365	symbol	H. sapiens	1365	H. sapiens	CLDN3	claudin 3	GO:0014045 establishment of endothelial blood-brain barrier;GO:0150111 regulation of transepithelial transport;GO:0060856 establishment of blood-brain barrier		Disease related genes; Cancer-related genes:Candidate cancer biomarkers; Human disease related genes:Other congenital disorders:Chromosomal abnormalities; Potential drug targets; Transporters:Transporter channels and pores	Cell Junctions (Supported)			(M5937)HALLMARK GLYCOLYSIS	0	0	1	1	0	0	1	1	0	1	1	0	1	0	0	1	0	0	0	0
HAS2	3037	symbol	H. sapiens	3037	H. sapiens	HAS2	hyaluronan synthase 2	GO:1900623 regulation of monocyte aggregation;GO:1900625 positive regulation of monocyte aggregation;GO:0090500 endocardial cushion to mesenchymal transition		Disease related genes; ENZYME proteins:Transferases; Enzymes; Potential drug targets	Nuclear speckles (Approved)			(M5942)HALLMARK UV RESPONSE DN; (M5932)HALLMARK INFLAMMATORY RESPONSE	0	0	1	1	0	0	0	0	1	0	0	0	0	0	0	1	0	0	0	0
CCND1	595	symbol	H. sapiens	595	H. sapiens	CCND1	cyclin D1	GO:0000320 re-entry into mitotic cell cycle;GO:0033601 positive regulation of mammary gland epithelial cell proliferation;GO:0033327 Leydig cell differentiation		Human disease related genes:Congenital malformations:Other congenital malformations; Predicted intracellular proteins; Human disease related genes:Cancers:Head and neck cancers; Human disease related genes:Cancers:Cancers of the digestive system; Cancer-related genes:Mutated cancer genes; Disease related genes; Cancer-related genes:Candidate cancer biomarkers; Human disease related genes:Cancers:…	Nucleoplasm (Supported)	Acetylsalicylic acid; Arsenic trioxide; Encorafenib; Bryostatin 1	(M209)PID P38 GAMMA DELTA PATHWAY; (M3686)SA REG CASCADE OF CYCLIN EXPR; (M1529)SA G1 AND S PHASES	(M5903)HALLMARK NOTCH SIGNALING; (M5908)HALLMARK ANDROGEN RESPONSE; (M5902)HALLMARK APOPTOSIS	0	1	1	1	0	0	1	0	1	0	0	1	0	0	1	1	1	0	0	1
NKD1	85407	symbol	H. sapiens	85407	H. sapiens	NKD1	NKD inhibitor of WNT signaling pathway 1	GO:0090249 regulation of cell migration involved in somitogenic axis elongation;GO:1901229 regulation of non-canonical Wnt signaling pathway via JNK cascade;GO:1901231 positive regulation of non-canonical Wnt signaling pathway via JNK cascade		Predicted intracellular proteins	Nucleoli fibrillar center (Approved)		(M70)PID PS1 PATHWAY; (M5493)WNT SIGNALING	(M5895)HALLMARK WNT BETA CATENIN SIGNALING	0	0	0	0	0	0	0	0	0	0	0	1	0	0	0	0	0	0	1	0
SOX2	6657	symbol	H. sapiens	6657	H. sapiens	SOX2	SRY-box transcription factor 2	GO:0001714 endodermal cell fate specification;GO:0021781 glial cell fate commitment;GO:0001711 endodermal cell fate commitment		Transcription factors:Other all-alpha-helical DNA-binding domains; Human disease related genes:Congenital malformations:Congenital malformations of the nervous system; Cancer-related genes; Human disease related genes:Congenital malformations:Congenital malformations of eye; Disease related genes; Predicted intracellular proteins	Nucleoplasm (Enhanced)				0	1	1	1	0	0	0	0	0	1	0	1	0	0	0	1	0	0	1	0
OTUB2	78990	symbol	H. sapiens	78990	H. sapiens	OTUB2	OTU deubiquitinase, ubiquitin aldehyde binding 2	GO:0033183 negative regulation of histone ubiquitination;GO:1901314 regulation of histone H2A K63-linked ubiquitination;GO:1901315 negative regulation of histone H2A K63-linked ubiquitination		Peptidases:Cysteine-type peptidases; Predicted intracellular proteins; Enzymes; ENZYME proteins:Hydrolases					0	0	0	0	0	0	0	0	0	0	0	0	0	0	0	0	0	0	0	0
ALDH1A1	216	symbol	H. sapiens	216	H. sapiens	ALDH1A1	aldehyde dehydrogenase 1 family member A1	GO:0030392 fructosamine catabolic process;GO:0030389 fructosamine metabolic process;GO:0009449 gamma-aminobutyric acid biosynthetic process		ENZYME proteins:Oxidoreductases; Predicted intracellular proteins; Enzymes	Cytosol (Enhanced)	NADH; Vitamin A; Tretinoin; 1,4-Dithiothreitol		(M5949)HALLMARK PEROXISOME; (M5948)HALLMARK BILE ACID METABOLISM; (M5935)HALLMARK FATTY ACID METABOLISM	0	0	0	1	0	0	0	0	0	0	0	0	0	0	1	0	1	0	0	0
GJB2	2706	symbol	H. sapiens	2706	H. sapiens	GJB2	gap junction protein beta 2	GO:1905867 epididymis development;GO:0044752 response to human chorionic gonadotropin;GO:1990349 gap junction-mediated intercellular transport		Human disease related genes:Congenital malformations:Congenital malformations of skin; Human disease related genes:Nervous system diseases:Ear disease; Disease related genes; Potential drug targets; Transporters:Transporter channels and pores	Mitochondria (Approved)				0	0	1	0	1	0	0	0	1	0	0	1	0	0	0	0	0	0	1	1
SLC47A1	55244	symbol	H. sapiens	55244	H. sapiens	SLC47A1	solute carrier family 47 member 1	GO:0097638 L-arginine import across plasma membrane;GO:1903826 L-arginine transmembrane transport;GO:1990961 xenobiotic detoxification by transmembrane export across the plasma membrane		Transporters:Electrochemical Potential-driven transporters					0	0	0	0	0	0	0	0	0	0	0	0	0	0	1	0	0	0	0	0
SDR9C7	121214	symbol	H. sapiens	121214	H. sapiens	SDR9C7	short chain dehydrogenase/reductase family 9C member 7			Disease related genes; Human disease related genes:Congenital malformations:Congenital malformations of skin; Predicted intracellular proteins					0	0	0	0	0	0	0	0	0	0	0	0	0	0	0	0	0	0	0	0
ZNF770	54989	symbol	H. sapiens	54989	H. sapiens	ZNF770	zinc finger protein 770	GO:0045944 positive regulation of transcription by RNA polymerase II;GO:0045893 positive regulation of transcription, DNA-templated;GO:1903508 positive regulation of nucleic acid-templated transcription		Transcription factors:Zinc-coordinating DNA-binding domains; Predicted intracellular proteins					0	0	0	0	0	0	0	0	0	0	0	0	0	0	0	0	0	0	0	0
OLFM1	10439	symbol	H. sapiens	10439	H. sapiens	OLFM1	olfactomedin 1	GO:0023041 neuronal signal transduction;GO:0003190 atrioventricular valve formation;GO:0003188 heart valve formation		Predicted intracellular proteins; Predicted secreted proteins	Nucleoli (Approved); Additional: Cytosol;Nucleoplasm			(M5941)HALLMARK UV RESPONSE UP; (M5906)HALLMARK ESTROGEN RESPONSE EARLY; (M5907)HALLMARK ESTROGEN RESPONSE LATE	0	0	0	0	0	0	0	0	0	0	0	1	0	0	1	0	0	0	0	0
SH2D1A	4068	symbol	H. sapiens	4068	H. sapiens	SH2D1A	SH2 domain containing 1A	GO:0050860 negative regulation of T cell receptor signaling pathway;GO:0045954 positive regulation of natural killer cell mediated cytotoxicity;GO:0002717 positive regulation of natural killer cell mediated immunity		Disease related genes; Human disease related genes:Immune system diseases:Primary immunodeficiency; Predicted intracellular proteins	Cytosol (Approved)		(M145)PID P53 DOWNSTREAM PATHWAY		0	0	0	0	0	1	0	0	0	0	0	0	0	0	0	0	0	1	0	0
STEAP4	79689	symbol	H. sapiens	79689	H. sapiens	STEAP4	STEAP4 metalloreductase	GO:0015677 copper ion import;GO:0033212 iron import into cell;GO:0070207 protein homotrimerization		ENZYME proteins:Oxidoreductases; Enzymes; Transporters:Transport Electron Carriers	Nucleoplasm;Plasma membrane (Approved)			(M5908)HALLMARK ANDROGEN RESPONSE	0	0	0	0	0	0	0	0	0	0	0	0	0	0	0	0	0	0	0	0
FGFR2	2263	symbol	H. sapiens	2263	H. sapiens	FGFR2	fibroblast growth factor receptor 2	GO:0035602 fibroblast growth factor receptor signaling pathway involved in negative regulation of apoptotic process in bone marrow cell;GO:0035603 fibroblast growth factor receptor signaling pathway involved in hemopoiesis;GO:0035604 fibroblast growth factor receptor signaling pathway involved in positive regulation of cell proliferation in bone marrow	Tyr protein kinase family	FDA approved drug targets:Small molecule drugs; Human disease related genes:Congenital malformations:Other congenital malformations; RAS pathway related proteins; Predicted intracellular proteins; ENZYME proteins:Transferases; Human disease related genes:Cancers:Cancers of the digestive system; Predicted secreted proteins; Cancer-related genes:Mutated cancer genes; Disease related genes; CD marke…	Cell Junctions (Supported); Additional: Nucleoplasm;Vesicles	Palifermin; Thalidomide; Heparin; Sucrosofate; 3-[4-(1-formylpiperazin-4-yl)-benzylidenyl]-2-indolinone; 4-[4-(1-Amino-1-Methylethyl)Phenyl]-5-Chloro-N-[4-(2-Morpholin-4-Ylethyl)Phenyl]Pyrimidin-2-Amine; Regorafenib; Ponatinib; Lenvatinib; Nintedanib; Foreskin fibroblast (neonatal); Foreskin keratinocyte (neonatal); Fostamatinib; Erdafitinib; Pemigatinib; Selpercatinib	(M276)PID FGF PATHWAY		0	1	1	1	1	0	1	0	1	0	1	1	0	0	0	1	0	1	1	0
TIGIT	201633	symbol	H. sapiens	201633	H. sapiens	TIGIT	T cell immunoreceptor with Ig and ITIM domains	GO:0032695 negative regulation of interleukin-12 production;GO:0032733 positive regulation of interleukin-10 production;GO:0032655 regulation of interleukin-12 production							1	0	1	0	0	0	0	1	0	0	0	0	0	0	0	0	0	0	0	0
LIPG	9388	symbol	H. sapiens	9388	H. sapiens	LIPG	lipase G, endothelial type	GO:0010983 positive regulation of high-density lipoprotein particle clearance;GO:0010982 regulation of high-density lipoprotein particle clearance;GO:0010986 positive regulation of lipoprotein particle clearance		Predicted secreted proteins; Predicted intracellular proteins; Enzymes; ENZYME proteins:Hydrolases					0	1	0	1	0	0	0	0	0	0	0	0	0	0	0	0	0	0	0	1
ADAMTS15	170689	symbol	H. sapiens	170689	H. sapiens	ADAMTS15	ADAM metallopeptidase with thrombospondin type 1 motif 15	GO:0007520 myoblast fusion;GO:0000768 syncytium formation by plasma membrane fusion;GO:0140253 cell-cell fusion		Predicted secreted proteins	Cytosol (Approved)		(M3468)NABA ECM REGULATORS; (M5885)NABA MATRISOME ASSOCIATED; (M5889)NABA MATRISOME		0	0	0	1	0	0	0	0	0	0	0	1	0	0	0	0	0	0	0	0
CD27	939	symbol	H. sapiens	939	H. sapiens	CD27	CD27 molecule	GO:0045579 positive regulation of B cell differentiation;GO:0070233 negative regulation of T cell apoptotic process;GO:0045577 regulation of B cell differentiation		Disease related genes; Cancer-related genes:Candidate cancer biomarkers; CD markers					0	1	1	0	0	0	1	1	0	1	0	0	0	0	0	0	0	1	0	0
GABRA3	2556	symbol	H. sapiens	2556	H. sapiens	GABRA3	gamma-aminobutyric acid type A receptor subunit alpha3	GO:0051932 synaptic transmission, GABAergic;GO:0007214 gamma-aminobutyric acid signaling pathway;GO:1902476 chloride transmembrane transport		Transporters:Transporter channels and pores; FDA approved drug targets:Small molecule drugs	Plasma membrane (Uncertain); Additional: Nucleoplasm	Butalbital; Talbutal; Pentobarbital; Meprobamate; Carisoprodol; Eszopiclone; Secobarbital; Zolpidem; Metharbital; Thiopental; Primidone; Methylphenobarbital; Ethanol; Zopiclone; Amobarbital; Aprobarbital; Butobarbital; Heptabarbital; Hexobarbital; Barbital; Dihydro-2-thioxo-5-((5-(2-(trifluoromethyl)phenyl)-2-furanyl)methyl)-4,6(1H,5H)-pyrimidinedione; Fludiazepam; Pagoclone; Ganaxolone; AZD-7325		(M5953)HALLMARK KRAS SIGNALING UP	0	0	0	0	0	0	0	0	0	0	0	0	0	0	0	0	0	0	0	0
CD6	923	symbol	H. sapiens	923	H. sapiens	CD6	CD6 molecule	GO:0002438 acute inflammatory response to antigenic stimulus;GO:0001771 immunological synapse formation;GO:1900017 positive regulation of cytokine production involved in inflammatory response		Predicted secreted proteins; CD markers					1	1	1	1	0	0	0	1	0	0	0	0	1	0	0	0	0	1	0	0
IL1A	3552	symbol	H. sapiens	3552	H. sapiens	IL1A	interleukin 1 alpha	GO:1904444 regulation of establishment of Sertoli cell barrier;GO:1904445 negative regulation of establishment of Sertoli cell barrier;GO:0001660 fever generation		Predicted intracellular proteins; Human disease related genes:Immune system diseases:Allergies and autoimmune diseases; Predicted secreted proteins; Cancer-related genes:Candidate cancer biomarkers; Human disease related genes:Skin diseases:Skin and soft tissue diseases; Transporters:Transporter channels and pores		Rilonacept	(M110)PID IL1 PATHWAY; (M239)PID A6B1 A6B4 INTEGRIN PATHWAY; (M236)PID DELTA NP63 PATHWAY	(M5902)HALLMARK APOPTOSIS; (M5890)HALLMARK TNFA SIGNALING VIA NFKB; (M5932)HALLMARK INFLAMMATORY RESPONSE	1	1	1	1	0	0	0	0	0	0	1	0	0	0	0	1	0	0	0	1
MAFK	7975	symbol	H. sapiens	7975	H. sapiens	MAFK	MAF bZIP transcription factor K	GO:0000122 negative regulation of transcription by RNA polymerase II;GO:0045892 negative regulation of transcription, DNA-templated;GO:1903507 negative regulation of nucleic acid-templated transcription		Transcription factors:Basic domains; Predicted intracellular proteins	Nucleoplasm (Enhanced)				0	0	0	0	0	0	0	0	0	0	0	0	1	0	0	0	0	0	0	0
CPA4	51200	symbol	H. sapiens	51200	H. sapiens	CPA4	carboxypeptidase A4	GO:0016573 histone acetylation;GO:0018393 internal peptidyl-lysine acetylation;GO:0006475 internal protein amino acid acetylation		Predicted secreted proteins; Peptidases:Metallopeptidases; Predicted intracellular proteins; Enzymes	Nucleoplasm (Approved); Additional: Centrosome;Cytosol				0	0	0	0	0	0	0	0	0	0	0	0	0	0	0	0	0	0	0	0
IKZF3	22806	symbol	H. sapiens	22806	H. sapiens	IKZF3	IKAROS family zinc finger 3	GO:0045577 regulation of B cell differentiation;GO:0030888 regulation of B cell proliferation;GO:0007498 mesoderm development		Transcription factors:Zinc-coordinating DNA-binding domains; Predicted intracellular proteins	Nucleoplasm (Supported); Additional: Cytosol		(M122)PID IL2 1PATHWAY		0	0	1	0	0	0	0	0	0	0	0	1	0	0	0	0	0	1	0	0
CAMK2N2	94032	symbol	H. sapiens	94032	H. sapiens	CAMK2N2	calcium/calmodulin dependent protein kinase II inhibitor 2	GO:0006469 negative regulation of protein kinase activity;GO:0033673 negative regulation of kinase activity;GO:0051348 negative regulation of transferase activity		Predicted intracellular proteins	Centrosome;Nucleoplasm (Supported)				0	0	0	1	0	0	0	0	0	0	0	0	0	0	0	0	0	0	0	0
TAF7L	54457	symbol	H. sapiens	54457	H. sapiens	TAF7L	TATA-box binding protein associated factor 7 like	GO:0051123 RNA polymerase II preinitiation complex assembly;GO:0070897 transcription preinitiation complex assembly;GO:0006367 transcription initiation from RNA polymerase II promoter		Predicted intracellular proteins	Nucleoplasm (Approved); Additional: Cytosol				0	0	0	0	0	0	0	0	0	0	0	0	0	0	0	0	0	0	0	0
PTN	5764	symbol	H. sapiens	5764	H. sapiens	PTN	pleiotrophin	GO:0031104 dendrite regeneration;GO:0043932 ossification involved in bone remodeling;GO:0007406 negative regulation of neuroblast proliferation		Predicted secreted proteins; Cancer-related genes:Candidate cancer biomarkers	Endoplasmic reticulum (Supported)		(M251)PID SYNDECAN 3 PATHWAY; (M5883)NABA SECRETED FACTORS; (M5885)NABA MATRISOME ASSOCIATED		0	0	1	1	1	1	0	0	1	1	0	1	0	0	0	1	0	0	0	0
ZFR2	23217	symbol	H. sapiens	23217	H. sapiens	ZFR2	zinc finger RNA binding protein 2			Predicted intracellular proteins	Nucleoplasm (Approved)				0	0	0	0	0	0	0	0	0	0	0	0	0	0	0	0	0	0	0	0
CD3D	915	symbol	H. sapiens	915	H. sapiens	CD3D	CD3 delta subunit of T-cell receptor complex	GO:0045059 positive thymic T cell selection;GO:0045061 thymic T cell selection;GO:0043368 positive T cell selection		CD markers; Disease related genes; Human disease related genes:Immune system diseases:Primary immunodeficiency; Predicted intracellular proteins; FDA approved drug targets:Biotech drugs	Endoplasmic reticulum (Uncertain)	Muromonab; Blinatumomab	(M290)PID IL12 STAT4 PATHWAY; (M88)PID CD8 TCR PATHWAY; (M54)PID IL12 2PATHWAY	(M5950)HALLMARK ALLOGRAFT REJECTION	0	1	1	1	0	1	0	0	0	0	0	0	0	0	0	0	0	1	0	0
SLAMF6	114836	symbol	H. sapiens	114836	H. sapiens	SLAMF6	SLAM family member 6	GO:0072540 T-helper 17 cell lineage commitment;GO:0072539 T-helper 17 cell differentiation;GO:0002295 T-helper cell lineage commitment		CD markers	Cytosol;Plasma membrane (Approved)				1	0	0	0	0	1	0	0	0	0	0	1	0	0	0	0	0	1	0	0
KIF26B	55083	symbol	H. sapiens	55083	H. sapiens	KIF26B	kinesin family member 26B	GO:0072092 ureteric bud invasion;GO:0072093 metanephric renal vesicle formation;GO:0072033 renal vesicle formation		Predicted intracellular proteins	Microtubules;Plasma membrane (Approved)				0	0	1	1	0	0	0	0	0	0	0	1	1	0	0	0	0	0	0	0
ITGA5	3678	symbol	H. sapiens	3678	H. sapiens	ITGA5	integrin subunit alpha 5	GO:0033631 cell-cell adhesion mediated by integrin;GO:0023035 CD40 signaling pathway;GO:0035313 wound healing, spreading of epidermal cells		Cancer-related genes:Candidate cancer biomarkers; CD markers		Resveratrol	(M274)PID LYMPH ANGIOGENESIS PATHWAY; (M47)PID INTEGRIN CS PATHWAY; (M165)PID SYNDECAN 4 PATHWAY	(M5930)HALLMARK EPITHELIAL MESENCHYMAL TRANSITION; (M5932)HALLMARK INFLAMMATORY RESPONSE	0	1	1	1	1	0	0	0	0	0	0	1	1	1	0	0	0	0	0	0
SCUBE2	57758	symbol	H. sapiens	57758	H. sapiens	SCUBE2	signal peptide, CUB domain and EGF like domain containing 2	GO:0007165 signal transduction;GO:0023052 signaling;GO:0007154 cell communication		Predicted intracellular proteins; Predicted secreted proteins			(M5883)NABA SECRETED FACTORS; (M5885)NABA MATRISOME ASSOCIATED; (M5889)NABA MATRISOME	(M5907)HALLMARK ESTROGEN RESPONSE LATE	0	0	0	1	0	0	0	0	0	0	0	0	0	0	0	0	0	0	0	0
MME	4311	symbol	H. sapiens	4311	H. sapiens	MME	membrane metalloendopeptidase	GO:0046449 creatinine metabolic process;GO:0061837 neuropeptide processing;GO:0072338 cellular lactam metabolic process		FDA approved drug targets:Small molecule drugs; Human disease related genes:Nervous system diseases:Neurodegenerative diseases; Predicted intracellular proteins; ENZYME proteins:Hydrolases; Candidate cardiovascular disease genes; Disease related genes; CD markers; Peptidases:Metallopeptidases; Enzymes; Cancer-related genes:Candidate cancer biomarkers		Candoxatril; Omapatrilat; N-[3-[(1-Aminoethyl)(Hydroxy)Phosphoryl]-2-(1,1'-Biphenyl-4-Ylmethyl)Propanoyl]Alanine; Phosphoramidon; N-(3-Phenyl-2-Sulfanylpropanoyl)Phenylalanylalanine; [2(R,S)-2-Sulfanylheptanoyl]-Phe-Ala; Daglutril; 2-[(1S)-1-BENZYL-2-SULFANYLETHYL]-1H-IMIDAZO[4,5-C]PYRIDIN-5-IUM; Thiorphan; Sacubitril; Candoxatrilat			0	1	1	0	1	0	0	0	1	0	0	0	0	0	0	1	0	0	0	0
SIT1	27240	symbol	H. sapiens	27240	H. sapiens	SIT1	signaling threshold regulating transmembrane adaptor 1	GO:0043029 T cell homeostasis;GO:0002260 lymphocyte homeostasis;GO:0001776 leukocyte homeostasis						(M5950)HALLMARK ALLOGRAFT REJECTION	0	0	1	0	0	0	0	0	0	0	0	0	0	0	0	0	0	1	0	0
ABCA13	154664	symbol	H. sapiens	154664	H. sapiens	ABCA13	ATP binding cassette subfamily A member 13	GO:1900244 positive regulation of synaptic vesicle endocytosis;GO:1903423 positive regulation of synaptic vesicle recycling;GO:1900242 regulation of synaptic vesicle endocytosis			Vesicles (Approved); Additional: Centrosome;Cytosol				0	1	0	0	0	0	0	0	0	0	0	0	0	0	0	0	0	0	0	0
SCEL	8796	symbol	H. sapiens	8796	H. sapiens	SCEL	sciellin	GO:0090263 positive regulation of canonical Wnt signaling pathway;GO:0030216 keratinocyte differentiation;GO:0030177 positive regulation of Wnt signaling pathway		Predicted intracellular proteins	Plasma membrane (Supported); Additional: Cytosol;Nucleoplasm				0	1	0	0	0	0	0	0	0	0	1	1	0	0	0	0	0	0	0	0
ADH7	131	symbol	H. sapiens	131	H. sapiens	ADH7	alcohol dehydrogenase 7 (class IV), mu or sigma polypeptide	GO:0010430 fatty acid omega-oxidation;GO:0006069 ethanol oxidation;GO:0006067 ethanol metabolic process		ENZYME proteins:Oxidoreductases; Predicted intracellular proteins; Enzymes	Cytosol;Plasma membrane (Supported)	NADH		(M5935)HALLMARK FATTY ACID METABOLISM; (M5934)HALLMARK XENOBIOTIC METABOLISM	0	0	1	1	0	0	1	0	0	0	0	0	0	0	1	0	1	0	0	0
CD8A	925	symbol	H. sapiens	925	H. sapiens	CD8A	CD8a molecule	GO:0045065 cytotoxic T cell differentiation;GO:0002456 T cell mediated immunity;GO:0019882 antigen processing and presentation		Disease related genes; Human disease related genes:Immune system diseases:Primary immunodeficiency; Predicted intracellular proteins; CD markers	Plasma membrane (Supported)		(M88)PID CD8 TCR PATHWAY; (M54)PID IL12 2PATHWAY; (M272)PID CD8 TCR DOWNSTREAM PATHWAY	(M5950)HALLMARK ALLOGRAFT REJECTION	0	1	0	1	0	1	0	1	0	0	0	0	0	0	0	0	0	1	0	0
COCH	1690	symbol	H. sapiens	1690	H. sapiens	COCH	cochlin	GO:0045089 positive regulation of innate immune response;GO:0008360 regulation of cell shape;GO:0007605 sensory perception of sound		Human disease related genes:Nervous system diseases:Ear disease; Predicted secreted proteins; Disease related genes; Potential drug targets; Predicted intracellular proteins; Transporters:Accessory Factors Involved in Transport	Vesicles (Supported)		(M3008)NABA ECM GLYCOPROTEINS; (M5884)NABA CORE MATRISOME; (M5889)NABA MATRISOME	(M5947)HALLMARK IL2 STAT5 SIGNALING	0	0	1	0	0	1	0	0	0	0	0	0	0	1	0	0	0	0	0	0
NOS2	4843	symbol	H. sapiens	4843	H. sapiens	NOS2	nitric oxide synthase 2	GO:0032310 prostaglandin secretion;GO:0015732 prostaglandin transport;GO:0017014 protein nitrosylation		Predicted intracellular proteins; Human disease related genes:Cancers:Cancers of the digestive system; ENZYME proteins:Oxidoreductases; Cancer-related genes:Candidate cancer biomarkers; Enzymes; FDA approved drug targets:Small molecule drugs		Arginine; Citrulline; Minocycline; Miconazole; Dexamethasone; N,N-dimethylarginine; 4R-Fluoro-N6-ethanimidoyl-L-lysine; 3-Bromo-7-Nitroindazole; N-[3-(aminomethyl)benzyl]acetamidine; 7-Nitroindazole; S-Ethylisothiourea; Thiocoumarin; N-omega-propyl-L-arginine; 6-Nitroindazole; N(5)-[(hydroxyamino)(imino)methyl]-L-ornithine; Imidazole; N-(4-{2-[(3-chlorobenzyl)amino]ethyl}phenyl)thiophene-2-carbox…	(M118)PID INTEGRIN A9B1 PATHWAY; (M196)PID IL23 PATHWAY; (M229)PID P38 ALPHA BETA DOWNSTREAM PATHWAY	(M5950)HALLMARK ALLOGRAFT REJECTION	1	1	1	1	0	1	0	0	1	0	0	0	1	0	1	0	1	0	0	1
POLA2	23649	symbol	H. sapiens	23649	H. sapiens	POLA2	DNA polymerase alpha 2, accessory subunit	GO:0006269 DNA replication, synthesis of RNA primer;GO:0006270 DNA replication initiation;GO:0006261 DNA-templated DNA replication		Predicted intracellular proteins	Nucleoplasm (Supported); Additional: Cytosol	Dacarbazine		(M5898)HALLMARK DNA REPAIR; (M5901)HALLMARK G2M CHECKPOINT; (M5925)HALLMARK E2F TARGETS	0	0	0	0	0	0	0	0	0	0	0	0	0	0	0	0	0	0	0	0
EPGN	255324	symbol	H. sapiens	255324	H. sapiens	EPGN	epithelial mitogen	GO:0045741 positive regulation of epidermal growth factor-activated receptor activity;GO:0007176 regulation of epidermal growth factor-activated receptor activity;GO:0045742 positive regulation of epidermal growth factor receptor signaling pathway		Predicted intracellular proteins; Predicted secreted proteins	Cytosol;Nucleoplasm (Approved); Additional: Vesicles		(M5883)NABA SECRETED FACTORS; (M5885)NABA MATRISOME ASSOCIATED; (M5889)NABA MATRISOME		0	0	1	1	0	0	0	0	0	0	0	0	0	0	0	0	0	0	0	0
POSTN	10631	symbol	H. sapiens	10631	H. sapiens	POSTN	periostin	GO:0071307 cellular response to vitamin K;GO:0032571 response to vitamin K;GO:0071295 cellular response to vitamin		Predicted secreted proteins; Cancer-related genes:Candidate cancer biomarkers	Golgi apparatus (Approved); Additional: Nucleoplasm		(M3008)NABA ECM GLYCOPROTEINS; (M5884)NABA CORE MATRISOME; (M5889)NABA MATRISOME	(M5944)HALLMARK ANGIOGENESIS; (M5930)HALLMARK EPITHELIAL MESENCHYMAL TRANSITION	0	0	0	0	0	0	0	0	0	0	0	0	0	1	0	0	0	0	0	1
GPR171	29909	symbol	H. sapiens	29909	H. sapiens	GPR171	G protein-coupled receptor 171	GO:0035589 G protein-coupled purinergic nucleotide receptor signaling pathway;GO:0060259 regulation of feeding behavior;GO:0035590 purinergic nucleotide receptor signaling pathway		G-protein coupled receptors:GPCRs excl olfactory receptors; Predicted intracellular proteins					0	0	0	0	0	0	0	0	0	0	0	0	0	0	0	1	0	0	0	0
LGALS9	3965	symbol	H. sapiens	3965	H. sapiens	LGALS9	galectin 9	GO:0070239 regulation of activated T cell autonomous cell death;GO:0070241 positive regulation of activated T cell autonomous cell death;GO:0032832 regulation of CD4-positive, CD25-positive, alpha-beta regulatory T cell differentiation involved in immune response		Predicted intracellular proteins; Predicted secreted proteins	Cytosol (Approved)	(R)-1-Para-Nitro-Phenyl-2-Azido-Ethanol	(M5880)NABA ECM AFFILIATED; (M5885)NABA MATRISOME ASSOCIATED; (M5889)NABA MATRISOME		1	1	1	1	1	1	0	0	0	1	0	0	0	0	1	1	0	1	0	0
P2RY10	27334	symbol	H. sapiens	27334	H. sapiens	P2RY10	P2Y receptor family member 10	GO:0035589 G protein-coupled purinergic nucleotide receptor signaling pathway;GO:0035590 purinergic nucleotide receptor signaling pathway;GO:0051482 positive regulation of cytosolic calcium ion concentration involved in phospholipase C-activating G protein-coupled signaling pathway		G-protein coupled receptors:GPCRs excl olfactory receptors; G-protein coupled receptors:Adenosine and adenine nucleotide receptors					0	0	0	0	0	0	0	0	0	0	0	0	0	0	0	0	0	0	0	0
VPREB3	29802	symbol	H. sapiens	29802	H. sapiens	VPREB3	V-set pre-B cell surrogate light chain 3	GO:0002377 immunoglobulin production;GO:0002440 production of molecular mediator of immune response;GO:0006955 immune response		Predicted intracellular proteins					0	0	0	0	0	0	0	0	0	0	0	0	1	0	0	0	0	0	0	0
GMFG	9535	symbol	H. sapiens	9535	H. sapiens	GMFG	glia maturation factor gamma	GO:0071846 actin filament debranching;GO:0034316 negative regulation of Arp2/3 complex-mediated actin nucleation;GO:0051126 negative regulation of actin nucleation		Predicted intracellular proteins	Cytosol;Nucleoplasm (Approved); Additional: Nuclear bodies				0	0	0	0	0	0	0	0	0	0	0	0	0	0	0	0	0	0	0	0
TPSB2	64499	symbol	H. sapiens	64499	H. sapiens	TPSB2	tryptase beta 2	GO:0006508 proteolysis;GO:0019538 protein metabolic process;GO:1901564 organonitrogen compound metabolic process		Predicted secreted proteins; Peptidases:Serine-type peptidases; Enzymes; ENZYME proteins:Hydrolases					0	0	1	0	0	0	0	0	0	0	0	0	0	0	0	0	0	0	0	0
CD2	914	symbol	H. sapiens	914	H. sapiens	CD2	CD2 molecule	GO:0030887 positive regulation of myeloid dendritic cell activation;GO:0001766 membrane raft polarization;GO:0030885 regulation of myeloid dendritic cell activation		Predicted intracellular proteins; FDA approved drug targets:Biotech drugs; CD markers	Plasma membrane (Supported); Additional: Golgi apparatus;Nucleoplasm	Alefacept; Siplizumab		(M5902)HALLMARK APOPTOSIS; (M5950)HALLMARK ALLOGRAFT REJECTION	1	1	1	0	0	0	0	1	0	0	0	0	1	0	0	0	0	1	0	0
LAMTOR4	389541	symbol	H. sapiens	389541	H. sapiens	LAMTOR4	late endosomal/lysosomal adaptor, MAPK and MTOR activator 4	GO:0038202 TORC1 signaling;GO:0031929 TOR signaling;GO:0061462 protein localization to lysosome		Predicted intracellular proteins	Vesicles (Supported)				0	0	0	1	0	0	0	0	0	0	0	0	0	0	0	0	0	0	0	0

## Sheet: Enrichment
GroupID	Category	Term	Description	LogP	Log(q-value)	InTerm_InList	Genes	Symbols
1_Summary	GO Biological Processes	GO:0001819	positive regulation of cytokine production	-8.13663	-3.78856	13/481	914,923,2069,2152,3552,3553,3965,4843,8140,8710,89780,114836,201633,3624	CD2,CD6,EREG,F3,IL1A,IL1B,LGALS9,NOS2,SLC7A5,SERPINB7,WNT3A,SLAMF6,TIGIT,INHBA
1_Member	GO Biological Processes	GO:0001819	positive regulation of cytokine production	-8.13663	-3.78856	13/481	914,923,2069,2152,3552,3553,3965,4843,8140,8710,89780,114836,201633	CD2,CD6,EREG,F3,IL1A,IL1B,LGALS9,NOS2,SLC7A5,SERPINB7,WNT3A,SLAMF6,TIGIT
1_Member	GO Biological Processes	GO:0032757	positive regulation of interleukin-8 production	-5.69778	-2.76159	5/62	914,2152,3553,3965,4843	CD2,F3,IL1B,LGALS9,NOS2
1_Member	GO Biological Processes	GO:0032649	regulation of interferon-gamma production	-5.57943	-2.67257	6/117	914,3553,3624,3965,8140,114836	CD2,IL1B,INHBA,LGALS9,SLC7A5,SLAMF6
1_Member	GO Biological Processes	GO:0032729	positive regulation of interferon-gamma production	-5.23006	-2.46177	5/77	914,3553,3965,8140,114836	CD2,IL1B,LGALS9,SLC7A5,SLAMF6
1_Member	GO Biological Processes	GO:0032677	regulation of interleukin-8 production	-4.63359	-2.12436	5/102	914,2152,3553,3965,4843	CD2,F3,IL1B,LGALS9,NOS2
1_Member	GO Biological Processes	GO:0032760	positive regulation of tumor necrosis factor production	-2.29779	-0.536306	3/104	914,3552,3965	CD2,IL1A,LGALS9
1_Member	GO Biological Processes	GO:1903557	positive regulation of tumor necrosis factor superfamily cytokine production	-2.25228	-0.500803	3/108	914,3552,3965	CD2,IL1A,LGALS9
2_Summary	KEGG Pathway	hsa04640	Hematopoietic cell lineage	-7.38775	-3.34071	7/99	914,915,925,3552,3553,3678,4311,358,595,1462,4843,2069,3965,6657,2263,3624,8796,923,2152,9388,154664,939,6352,10663,345274,7078,89780,4915,80045,6781	CD2,CD3D,CD8A,IL1A,IL1B,ITGA5,MME,AQP1,CCND1,VCAN,NOS2,EREG,LGALS9,SOX2,FGFR2,INHBA,SCEL,CD6,F3,LIPG,ABCA13,CD27,CCL5,CXCR6,SLC10A6,TIMP3,WNT3A,NTRK2,GPR157,STC1
2_Member	KEGG Pathway	hsa04640	Hematopoietic cell lineage	-7.38775	-3.34071	7/99	914,915,925,3552,3553,3678,4311	CD2,CD3D,CD8A,IL1A,IL1B,ITGA5,MME
2_Member	WikiPathways	WP2431	Spinal cord injury	-5.5155	-2.67257	6/120	358,595,1462,3552,3553,4843	AQP1,CCND1,VCAN,IL1A,IL1B,NOS2
2_Member	GO Biological Processes	GO:0032755	positive regulation of interleukin-6 production	-4.73932	-2.16934	5/97	2069,3552,3553,3965,4843	EREG,IL1A,IL1B,LGALS9,NOS2
2_Member	Reactome Gene Sets	R-HSA-6785807	Interleukin-4 and Interleukin-13 signaling	-4.51384	-2.0634	5/108	595,3552,3553,4843,6657	CCND1,IL1A,IL1B,NOS2,SOX2
2_Member	WikiPathways	WP5055	Burn wound healing	-4.47551	-2.03053	5/110	2263,3552,3553,3624,8796	FGFR2,IL1A,IL1B,INHBA,SCEL
2_Member	Canonical Pathways	M54	PID IL12 2PATHWAY	-4.26368	-1.89221	4/62	915,925,3553,4843	CD3D,CD8A,IL1B,NOS2
2_Member	GO Biological Processes	GO:0002526	acute inflammatory response	-3.93977	-1.67448	4/75	923,2152,3552,3553	CD6,F3,IL1A,IL1B
2_Member	KEGG Pathway	hsa05133	Pertussis	-3.91738	-1.66622	4/76	3552,3553,3678,4843	IL1A,IL1B,ITGA5,NOS2
2_Member	GO Biological Processes	GO:0032370	positive regulation of lipid transport	-3.69019	-1.5153	4/87	3552,3553,9388,154664	IL1A,IL1B,LIPG,ABCA13
2_Member	WikiPathways	WP3617	Photodynamic therapy-induced NF-kB survival signaling	-3.67057	-1.49859	3/35	595,3552,3553	CCND1,IL1A,IL1B
2_Member	GO Biological Processes	GO:0097191	extrinsic apoptotic signaling pathway	-3.63356	-1.48139	4/90	939,3552,3553,3624	CD27,IL1A,IL1B,INHBA
2_Member	WikiPathways	WP69	T-cell receptor signaling pathway	-3.61514	-1.4706	4/91	915,925,3552,3553	CD3D,CD8A,IL1A,IL1B
2_Member	GO Biological Processes	GO:0032675	regulation of interleukin-6 production	-3.53735	-1.41588	5/174	2069,3552,3553,3965,4843	EREG,IL1A,IL1B,LGALS9,NOS2
2_Member	KEGG Pathway	hsa04933	AGE-RAGE signaling pathway in diabetic complications	-3.45854	-1.36815	4/100	595,2152,3552,3553	CCND1,F3,IL1A,IL1B
2_Member	GO Biological Processes	GO:0045766	positive regulation of angiogenesis	-3.42593	-1.34726	5/184	358,2152,3552,3553,3678	AQP1,F3,IL1A,IL1B,ITGA5
2_Member	GO Biological Processes	GO:1904018	positive regulation of vasculature development	-3.42593	-1.34726	5/184	358,2152,3552,3553,3678	AQP1,F3,IL1A,IL1B,ITGA5
2_Member	GO Biological Processes	GO:2001239	regulation of extrinsic apoptotic signaling pathway in absence of ligand	-3.37385	-1.30681	3/44	3552,3553,3624	IL1A,IL1B,INHBA
2_Member	KEGG Pathway	hsa04060	Cytokine-cytokine receptor interaction	-3.34058	-1.29136	6/295	939,3552,3553,3624,6352,10663	CD27,IL1A,IL1B,INHBA,CCL5,CXCR6
2_Member	GO Biological Processes	GO:1905954	positive regulation of lipid localization	-3.27198	-1.23778	4/112	3552,3553,9388,154664	IL1A,IL1B,LIPG,ABCA13
2_Member	WikiPathways	WP5115	Network map of SARS-CoV-2 signaling pathway	-3.0658	-1.07946	5/221	914,925,3552,3553,6352	CD2,CD8A,IL1A,IL1B,CCL5
2_Member	Reactome Gene Sets	R-HSA-449147	Signaling by Interleukins	-3.05376	-1.06931	7/462	595,3552,3553,3965,4843,6352,6657	CCND1,IL1A,IL1B,LGALS9,NOS2,CCL5,SOX2
2_Member	GO Biological Processes	GO:0010876	lipid localization	-2.9358	-0.97512	6/353	3553,3624,4843,9388,154664,345274	IL1B,INHBA,NOS2,LIPG,ABCA13,SLC10A6
2_Member	WikiPathways	WP4630	Measles virus infection	-2.93334	-0.974431	4/138	595,915,3552,3553	CCND1,CD3D,IL1A,IL1B
2_Member	KEGG Pathway	hsa05162	Measles	-2.92175	-0.968326	4/139	595,915,3552,3553	CCND1,CD3D,IL1A,IL1B
2_Member	GO Biological Processes	GO:0032368	regulation of lipid transport	-2.7686	-0.872315	4/153	3552,3553,9388,154664	IL1A,IL1B,LIPG,ABCA13
2_Member	GO Biological Processes	GO:2001236	regulation of extrinsic apoptotic signaling pathway	-2.7686	-0.872315	4/153	3552,3553,3624,7078	IL1A,IL1B,INHBA,TIMP3
2_Member	WikiPathways	WP5124	Alzheimer's disease	-2.70357	-0.829713	5/267	3552,3553,4311,4843,89780	IL1A,IL1B,MME,NOS2,WNT3A
2_Member	WikiPathways	WP706	Sudden infant death syndrome (SIDS) susceptibility pathways	-2.67817	-0.808667	4/162	3552,3553,4915,6657	IL1A,IL1B,NTRK2,SOX2
2_Member	KEGG Pathway	hsa05140	Leishmaniasis	-2.66595	-0.799323	3/77	3552,3553,4843	IL1A,IL1B,NOS2
2_Member	GO Biological Processes	GO:0010001	glial cell differentiation	-2.63033	-0.777805	4/167	3553,4915,6657,80045	IL1B,NTRK2,SOX2,GPR157
2_Member	Reactome Gene Sets	R-HSA-1280215	Cytokine Signaling in Immune system	-2.58251	-0.740948	8/715	595,939,3552,3553,3965,4843,6352,6657	CCND1,CD27,IL1A,IL1B,LGALS9,NOS2,CCL5,SOX2
2_Member	GO Biological Processes	GO:1905952	regulation of lipid localization	-2.48745	-0.674581	4/183	3552,3553,9388,154664	IL1A,IL1B,LIPG,ABCA13
2_Member	GO Biological Processes	GO:0044070	regulation of anion transport	-2.47367	-0.665928	3/90	3552,3553,6781	IL1A,IL1B,STC1
2_Member	GO Biological Processes	GO:0046330	positive regulation of JNK cascade	-2.39487	-0.605507	3/96	939,3552,3553	CD27,IL1A,IL1B
2_Member	GO Biological Processes	GO:0006869	lipid transport	-2.3786	-0.597554	5/318	3624,4843,9388,154664,345274	INHBA,NOS2,LIPG,ABCA13,SLC10A6
2_Member	WikiPathways	WP2059	Alzheimer's disease and miRNA effects	-2.27309	-0.517193	5/337	3552,3553,4311,4843,89780	IL1A,IL1B,MME,NOS2,WNT3A
2_Member	GO Biological Processes	GO:0042063	gliogenesis	-2.25434	-0.501763	4/213	3553,4915,6657,80045	IL1B,NTRK2,SOX2,GPR157
2_Member	GO Biological Processes	GO:0045765	regulation of angiogenesis	-2.2204	-0.473305	5/347	358,2152,3552,3553,3678	AQP1,F3,IL1A,IL1B,ITGA5
2_Member	GO Biological Processes	GO:1901342	regulation of vasculature development	-2.18967	-0.450127	5/353	358,2152,3552,3553,3678	AQP1,F3,IL1A,IL1B,ITGA5
2_Member	KEGG Pathway	hsa05010	Alzheimer disease	-2.04051	-0.34072	5/384	3552,3553,4311,4843,89780	IL1A,IL1B,MME,NOS2,WNT3A
2_Member	WikiPathways	WP382	MAPK signaling pathway	-2.0203	-0.322541	4/249	2263,3552,3553,4915	FGFR2,IL1A,IL1B,NTRK2
2_Member	GO Biological Processes	GO:0032874	positive regulation of stress-activated MAPK cascade	-2.01333	-0.3204	3/132	939,3552,3553	CD27,IL1A,IL1B
3_Summary	GO Biological Processes	GO:0022409	positive regulation of cell-cell adhesion	-7.03888	-3.20654	10/312	923,939,3037,3552,3553,3965,6352,6657,55083,89780,358,1373,2263,2706,3624,4843,6781,914,22806,27240,201633,3678,131,1690,81848,4915,7039,7078,255324,2152,4973,5764,10663,1365,131578,595,8140,2069,4311,9783,7177,64499,915	CD6,CD27,HAS2,IL1A,IL1B,LGALS9,CCL5,SOX2,KIF26B,WNT3A,AQP1,CPS1,FGFR2,GJB2,INHBA,NOS2,STC1,CD2,IKZF3,SIT1,TIGIT,ITGA5,ADH7,COCH,SPRY4,NTRK2,TGFA,TIMP3,EPGN,F3,OLR1,PTN,CXCR6,CLDN3,LRRC15,CCND1,SLC7A5,EREG,MME,RIMS3,TPSAB1,TPSB2,CD3D
3_Member	GO Biological Processes	GO:0022409	positive regulation of cell-cell adhesion	-7.03888	-3.20654	10/312	923,939,3037,3552,3553,3965,6352,6657,55083,89780	CD6,CD27,HAS2,IL1A,IL1B,LGALS9,CCL5,SOX2,KIF26B,WNT3A
3_Member	GO Biological Processes	GO:0071396	cellular response to lipid	-6.95255	-3.20654	12/503	358,923,1373,2263,2706,3552,3553,3624,4843,6352,6781,89780	AQP1,CD6,CPS1,FGFR2,GJB2,IL1A,IL1B,INHBA,NOS2,CCL5,STC1,WNT3A
3_Member	GO Biological Processes	GO:0051249	regulation of lymphocyte activation	-6.47912	-3.00746	12/557	914,923,939,3552,3553,3624,3965,6352,22806,27240,89780,201633	CD2,CD6,CD27,IL1A,IL1B,INHBA,LGALS9,CCL5,IKZF3,SIT1,WNT3A,TIGIT
3_Member	GO Biological Processes	GO:0045785	positive regulation of cell adhesion	-6.3176	-2.96187	11/471	923,939,3037,3552,3553,3678,3965,6352,6657,55083,89780	CD6,CD27,HAS2,IL1A,IL1B,ITGA5,LGALS9,CCL5,SOX2,KIF26B,WNT3A
3_Member	GO Biological Processes	GO:0022407	regulation of cell-cell adhesion	-6.26357	-2.96187	11/477	923,939,3037,3552,3553,3965,6352,6657,55083,89780,201633	CD6,CD27,HAS2,IL1A,IL1B,LGALS9,CCL5,SOX2,KIF26B,WNT3A,TIGIT
3_Member	GO Biological Processes	GO:0009617	response to bacterium	-6.0362	-2.83425	13/732	131,358,923,1373,1690,2263,2706,3552,3553,3965,4843,6352,22806	ADH7,AQP1,CD6,CPS1,COCH,FGFR2,GJB2,IL1A,IL1B,LGALS9,NOS2,CCL5,IKZF3
3_Member	GO Biological Processes	GO:0032496	response to lipopolysaccharide	-5.93241	-2.81479	9/318	923,1373,2263,2706,3552,3553,3965,4843,6352	CD6,CPS1,FGFR2,GJB2,IL1A,IL1B,LGALS9,NOS2,CCL5
3_Member	GO Biological Processes	GO:0002694	regulation of leukocyte activation	-5.74908	-2.76159	12/654	914,923,939,3552,3553,3624,3965,6352,22806,27240,89780,201633	CD2,CD6,CD27,IL1A,IL1B,INHBA,LGALS9,CCL5,IKZF3,SIT1,WNT3A,TIGIT
3_Member	GO Biological Processes	GO:0002237	response to molecule of bacterial origin	-5.70414	-2.76159	9/339	923,1373,2263,2706,3552,3553,3965,4843,6352	CD6,CPS1,FGFR2,GJB2,IL1A,IL1B,LGALS9,NOS2,CCL5
3_Member	GO Biological Processes	GO:0030155	regulation of cell adhesion	-5.69469	-2.76159	13/786	923,939,3037,3552,3553,3678,3965,6352,6657,55083,81848,89780,201633	CD6,CD27,HAS2,IL1A,IL1B,ITGA5,LGALS9,CCL5,SOX2,KIF26B,SPRY4,WNT3A,TIGIT
3_Member	GO Biological Processes	GO:0043408	regulation of MAPK cascade	-5.52287	-2.67257	12/688	939,2263,3552,3553,3965,4915,6352,6657,7039,7078,81848,255324	CD27,FGFR2,IL1A,IL1B,LGALS9,NTRK2,CCL5,SOX2,TGFA,TIMP3,SPRY4,EPGN
3_Member	GO Biological Processes	GO:0050863	regulation of T cell activation	-5.4523	-2.63571	9/364	914,923,939,3552,3553,3965,6352,27240,201633	CD2,CD6,CD27,IL1A,IL1B,LGALS9,CCL5,SIT1,TIGIT
3_Member	GO Biological Processes	GO:0050865	regulation of cell activation	-5.38971	-2.58571	12/709	914,923,939,3552,3553,3624,3965,6352,22806,27240,89780,201633	CD2,CD6,CD27,IL1A,IL1B,INHBA,LGALS9,CCL5,IKZF3,SIT1,WNT3A,TIGIT
3_Member	GO Biological Processes	GO:0043410	positive regulation of MAPK cascade	-5.25008	-2.47021	10/492	939,2263,3552,3553,3965,4915,6352,6657,7039,255324	CD27,FGFR2,IL1A,IL1B,LGALS9,NTRK2,CCL5,SOX2,TGFA,EPGN
3_Member	GO Biological Processes	GO:0050671	positive regulation of lymphocyte proliferation	-5.09364	-2.34763	6/142	923,3552,3553,3965,6352,89780	CD6,IL1A,IL1B,LGALS9,CCL5,WNT3A
3_Member	GO Biological Processes	GO:0032946	positive regulation of mononuclear cell proliferation	-5.05885	-2.33403	6/144	923,3552,3553,3965,6352,89780	CD6,IL1A,IL1B,LGALS9,CCL5,WNT3A
3_Member	GO Biological Processes	GO:0006954	inflammatory response	-5.01896	-2.32182	10/523	923,2152,3552,3553,3965,4843,4973,5764,6352,10663	CD6,F3,IL1A,IL1B,LGALS9,NOS2,OLR1,PTN,CCL5,CXCR6
3_Member	GO Biological Processes	GO:0050670	regulation of lymphocyte proliferation	-4.9119	-2.27138	7/231	923,3552,3553,3965,6352,22806,89780	CD6,IL1A,IL1B,LGALS9,CCL5,IKZF3,WNT3A
3_Member	GO Biological Processes	GO:0032944	regulation of mononuclear cell proliferation	-4.87566	-2.25187	7/234	923,3552,3553,3965,6352,22806,89780	CD6,IL1A,IL1B,LGALS9,CCL5,IKZF3,WNT3A
3_Member	GO Biological Processes	GO:0070665	positive regulation of leukocyte proliferation	-4.8136	-2.21372	6/159	923,3552,3553,3965,6352,89780	CD6,IL1A,IL1B,LGALS9,CCL5,WNT3A
3_Member	GO Biological Processes	GO:0030335	positive regulation of cell migration	-4.76331	-2.17867	10/560	1365,2152,3037,3552,3553,3678,3965,5764,6352,131578	CLDN3,F3,HAS2,IL1A,IL1B,ITGA5,LGALS9,PTN,CCL5,LRRC15
3_Member	WikiPathways	WP5087	Malignant pleural mesothelioma	-4.73926	-2.16934	9/447	595,2263,3553,3965,4915,6352,7039,8140,89780	CCND1,FGFR2,IL1B,LGALS9,NTRK2,CCL5,TGFA,SLC7A5,WNT3A
3_Member	GO Biological Processes	GO:0070663	regulation of leukocyte proliferation	-4.63564	-2.12436	7/255	923,3552,3553,3965,6352,22806,89780	CD6,IL1A,IL1B,LGALS9,CCL5,IKZF3,WNT3A
3_Member	GO Biological Processes	GO:0071345	cellular response to cytokine stimulus	-4.62206	-2.11909	11/710	2069,2152,3037,3552,3553,3965,4311,4843,6352,10663,81848	EREG,F3,HAS2,IL1A,IL1B,LGALS9,MME,NOS2,CCL5,CXCR6,SPRY4
3_Member	GO Biological Processes	GO:2000147	positive regulation of cell motility	-4.60797	-2.11723	10/584	1365,2152,3037,3552,3553,3678,3965,5764,6352,131578	CLDN3,F3,HAS2,IL1A,IL1B,ITGA5,LGALS9,PTN,CCL5,LRRC15
3_Member	GO Biological Processes	GO:0042102	positive regulation of T cell proliferation	-4.59285	-2.1081	5/104	923,3552,3553,3965,6352	CD6,IL1A,IL1B,LGALS9,CCL5
3_Member	GO Biological Processes	GO:1903037	regulation of leukocyte cell-cell adhesion	-4.53342	-2.0634	8/364	923,939,3037,3552,3553,3965,6352,201633	CD6,CD27,HAS2,IL1A,IL1B,LGALS9,CCL5,TIGIT
3_Member	GO Biological Processes	GO:1903039	positive regulation of leukocyte cell-cell adhesion	-4.529	-2.0634	7/265	923,939,3037,3552,3553,3965,6352	CD6,CD27,HAS2,IL1A,IL1B,LGALS9,CCL5
3_Member	GO Biological Processes	GO:0051272	positive regulation of cellular component movement	-4.52698	-2.0634	10/597	1365,2152,3037,3552,3553,3678,3965,5764,6352,131578	CLDN3,F3,HAS2,IL1A,IL1B,ITGA5,LGALS9,PTN,CCL5,LRRC15
3_Member	GO Biological Processes	GO:0040017	positive regulation of locomotion	-4.51471	-2.0634	10/599	1365,2152,3037,3552,3553,3678,3965,5764,6352,131578	CLDN3,F3,HAS2,IL1A,IL1B,ITGA5,LGALS9,PTN,CCL5,LRRC15
3_Member	GO Biological Processes	GO:0070372	regulation of ERK1 and ERK2 cascade	-4.0822	-1.76245	7/312	2263,3552,3553,3965,6352,7078,81848	FGFR2,IL1A,IL1B,LGALS9,CCL5,TIMP3,SPRY4
3_Member	GO Biological Processes	GO:0002696	positive regulation of leukocyte activation	-3.95123	-1.68234	8/441	914,923,939,3552,3553,3965,6352,89780	CD2,CD6,CD27,IL1A,IL1B,LGALS9,CCL5,WNT3A
3_Member	GO Biological Processes	GO:0050867	positive regulation of cell activation	-3.83873	-1.61776	8/458	914,923,939,3552,3553,3965,6352,89780	CD2,CD6,CD27,IL1A,IL1B,LGALS9,CCL5,WNT3A
3_Member	GO Biological Processes	GO:0050870	positive regulation of T cell activation	-3.79082	-1.57968	6/243	923,939,3552,3553,3965,6352	CD6,CD27,IL1A,IL1B,LGALS9,CCL5
3_Member	GO Biological Processes	GO:0070232	regulation of T cell apoptotic process	-3.70845	-1.52306	3/34	939,3965,6352	CD27,LGALS9,CCL5
3_Member	GO Biological Processes	GO:0051046	regulation of secretion	-3.70678	-1.52306	9/610	358,3552,3553,3624,3965,4843,6352,6781,9783	AQP1,IL1A,IL1B,INHBA,LGALS9,NOS2,CCL5,STC1,RIMS3
3_Member	GO Biological Processes	GO:0031663	lipopolysaccharide-mediated signaling pathway	-3.59815	-1.46227	3/37	923,3553,6352	CD6,IL1B,CCL5
3_Member	KEGG Pathway	hsa05164	Influenza A	-3.57217	-1.43894	5/171	3552,3553,6352,7177,64499	IL1A,IL1B,CCL5,TPSAB1,TPSB2
3_Member	GO Biological Processes	GO:0042129	regulation of T cell proliferation	-3.52589	-1.41335	5/175	923,3552,3553,3965,6352	CD6,IL1A,IL1B,LGALS9,CCL5
3_Member	GO Biological Processes	GO:0051251	positive regulation of lymphocyte activation	-3.48209	-1.38199	7/391	923,939,3552,3553,3965,6352,89780	CD6,CD27,IL1A,IL1B,LGALS9,CCL5,WNT3A
3_Member	KEGG Pathway	hsa05142	Chagas disease	-3.42582	-1.34726	4/102	915,3553,4843,6352	CD3D,IL1B,NOS2,CCL5
3_Member	Reactome Gene Sets	R-HSA-6783783	Interleukin-10 signaling	-3.28907	-1.25063	3/47	3552,3553,6352	IL1A,IL1B,CCL5
3_Member	GO Biological Processes	GO:0071222	cellular response to lipopolysaccharide	-3.26102	-1.23517	5/200	923,3552,3553,4843,6352	CD6,IL1A,IL1B,NOS2,CCL5
3_Member	GO Biological Processes	GO:0071219	cellular response to molecule of bacterial origin	-3.14678	-1.13915	5/212	923,3552,3553,4843,6352	CD6,IL1A,IL1B,NOS2,CCL5
3_Member	GO Biological Processes	GO:0070228	regulation of lymphocyte apoptotic process	-3.04312	-1.06241	3/57	939,3965,6352	CD27,LGALS9,CCL5
3_Member	GO Biological Processes	GO:0050920	regulation of chemotaxis	-3.02242	-1.04541	5/226	2152,3965,5764,6352,89780	F3,LGALS9,PTN,CCL5,WNT3A
3_Member	GO Biological Processes	GO:0070555	response to interleukin-1	-3.00487	-1.02971	4/132	3037,3553,3965,6352	HAS2,IL1B,LGALS9,CCL5
3_Member	WikiPathways	WP3624	Lung fibrosis	-2.91672	-0.968326	3/63	3553,6352,7039	IL1B,CCL5,TGFA
3_Member	GO Biological Processes	GO:0071216	cellular response to biotic stimulus	-2.91456	-0.967886	5/239	923,3552,3553,4843,6352	CD6,IL1A,IL1B,NOS2,CCL5
3_Member	GO Biological Processes	GO:0050921	positive regulation of chemotaxis	-2.91025	-0.967016	4/140	2152,3965,5764,6352	F3,LGALS9,PTN,CCL5
3_Member	GO Biological Processes	GO:0002687	positive regulation of leukocyte migration	-2.89885	-0.959017	4/141	3552,3965,5764,6352	IL1A,LGALS9,PTN,CCL5
3_Member	GO Biological Processes	GO:0019221	cytokine-mediated signaling pathway	-2.8923	-0.95585	6/360	2069,2152,3552,3553,6352,10663	EREG,F3,IL1A,IL1B,CCL5,CXCR6
3_Member	GO Biological Processes	GO:1901224	positive regulation of NIK/NF-kappaB signaling	-2.83941	-0.921089	3/67	939,3553,3965	CD27,IL1B,LGALS9
3_Member	WikiPathways	WP4754	IL-18 signaling pathway	-2.62088	-0.772498	5/279	1365,3553,4843,6352,7078	CLDN3,IL1B,NOS2,CCL5,TIMP3
3_Member	GO Biological Processes	GO:1903530	regulation of secretion by cell	-2.60512	-0.759472	7/554	3552,3553,3624,3965,4843,6352,9783	IL1A,IL1B,INHBA,LGALS9,NOS2,CCL5,RIMS3
3_Member	GO Biological Processes	GO:2000106	regulation of leukocyte apoptotic process	-2.54383	-0.716899	3/85	939,3965,6352	CD27,LGALS9,CCL5
3_Member	GO Biological Processes	GO:0000165	MAPK cascade	-2.51314	-0.692758	4/180	3553,3965,6352,255324	IL1B,LGALS9,CCL5,EPGN
3_Member	KEGG Pathway	hsa05323	Rheumatoid arthritis	-2.43358	-0.633281	3/93	3552,3553,6352	IL1A,IL1B,CCL5
3_Member	GO Biological Processes	GO:0002690	positive regulation of leukocyte chemotaxis	-2.42053	-0.622682	3/94	3965,5764,6352	LGALS9,PTN,CCL5
3_Member	GO Biological Processes	GO:0071347	cellular response to interleukin-1	-2.32127	-0.550693	3/102	3037,3553,6352	HAS2,IL1B,CCL5
3_Member	GO Biological Processes	GO:0060326	cell chemotaxis	-2.29782	-0.536306	4/207	3553,5764,6352,10663	IL1B,PTN,CCL5,CXCR6
3_Member	GO Biological Processes	GO:0071346	cellular response to interferon-gamma	-2.29779	-0.536306	3/104	3965,4843,6352	LGALS9,NOS2,CCL5
3_Member	GO Biological Processes	GO:1901222	regulation of NIK/NF-kappaB signaling	-2.23021	-0.482024	3/110	939,3553,3965	CD27,IL1B,LGALS9
3_Member	GO Biological Processes	GO:0002685	regulation of leukocyte migration	-2.21226	-0.466245	4/219	3552,3965,5764,6352	IL1A,LGALS9,PTN,CCL5
3_Member	GO Biological Processes	GO:0070374	positive regulation of ERK1 and ERK2 cascade	-2.19853	-0.456836	4/221	2263,3552,3965,6352	FGFR2,IL1A,LGALS9,CCL5
3_Member	GO Biological Processes	GO:0006935	chemotaxis	-2.16686	-0.437605	6/506	3553,3965,5764,6352,10663,89780	IL1B,LGALS9,PTN,CCL5,CXCR6,WNT3A
3_Member	GO Biological Processes	GO:0042330	taxis	-2.1588	-0.43087	6/508	3553,3965,5764,6352,10663,89780	IL1B,LGALS9,PTN,CCL5,CXCR6,WNT3A
3_Member	GO Biological Processes	GO:0046883	regulation of hormone secretion	-2.12551	-0.403779	4/232	3553,3624,4843,6352	IL1B,INHBA,NOS2,CCL5
3_Member	GO Biological Processes	GO:0002688	regulation of leukocyte chemotaxis	-2.0872	-0.375617	3/124	3965,5764,6352	LGALS9,PTN,CCL5
3_Member	GO Biological Processes	GO:0034341	response to interferon-gamma	-2.06824	-0.364612	3/126	3965,4843,6352	LGALS9,NOS2,CCL5
3_Member	WikiPathways	WP5095	Overview of proinflammatory and profibrotic mediators	-2.04043	-0.34072	3/129	3552,3553,6352	IL1A,IL1B,CCL5
3_Member	GO Biological Processes	GO:0050708	regulation of protein secretion	-2.00262	-0.31256	4/252	3552,3553,4843,6352	IL1A,IL1B,NOS2,CCL5
4_Summary	Canonical Pathways	M5885	NABA MATRISOME ASSOCIATED	-6.72506	-3.0884	14/751	2069,3552,3553,3624,3965,5764,6352,7039,7078,8710,57758,89780,170689,255324,595,2152,2263,3037,6657,923,1365,3678,4915,81848,94032,11082,55083,915,216,220,113,389541,925,6781,9388,2938,4843,131,1373,358	EREG,IL1A,IL1B,INHBA,LGALS9,PTN,CCL5,TGFA,TIMP3,SERPINB7,SCUBE2,WNT3A,ADAMTS15,EPGN,CCND1,F3,FGFR2,HAS2,SOX2,CD6,CLDN3,ITGA5,NTRK2,SPRY4,CAMK2N2,ESM1,KIF26B,CD3D,ALDH1A1,ALDH1A3,ADCY7,LAMTOR4,CD8A,STC1,LIPG,GSTA1,NOS2,ADH7,CPS1,AQP1
4_Member	Canonical Pathways	M5885	NABA MATRISOME ASSOCIATED	-6.72506	-3.0884	14/751	2069,3552,3553,3624,3965,5764,6352,7039,7078,8710,57758,89780,170689,255324	EREG,IL1A,IL1B,INHBA,LGALS9,PTN,CCL5,TGFA,TIMP3,SERPINB7,SCUBE2,WNT3A,ADAMTS15,EPGN
4_Member	Canonical Pathways	M5883	NABA SECRETED FACTORS	-6.65832	-3.0884	10/343	2069,3552,3553,3624,5764,6352,7039,57758,89780,255324	EREG,IL1A,IL1B,INHBA,PTN,CCL5,TGFA,SCUBE2,WNT3A,EPGN
4_Member	GO Biological Processes	GO:0045840	positive regulation of mitotic nuclear division	-6.45244	-3.00746	5/44	2069,3552,3553,7039,255324	EREG,IL1A,IL1B,TGFA,EPGN
4_Member	GO Biological Processes	GO:0050679	positive regulation of epithelial cell proliferation	-6.28838	-2.96187	8/210	595,2152,2263,3037,5764,7039,89780,255324	CCND1,F3,FGFR2,HAS2,PTN,TGFA,WNT3A,EPGN
4_Member	GO Biological Processes	GO:0050678	regulation of epithelial cell proliferation	-6.23076	-2.96187	10/382	595,2069,2152,2263,3037,5764,6657,7039,89780,255324	CCND1,EREG,F3,FGFR2,HAS2,PTN,SOX2,TGFA,WNT3A,EPGN
4_Member	GO Biological Processes	GO:0051781	positive regulation of cell division	-6.19258	-2.95845	6/92	2069,2263,3552,3553,5764,7039	EREG,FGFR2,IL1A,IL1B,PTN,TGFA
4_Member	GO Biological Processes	GO:0061098	positive regulation of protein tyrosine kinase activity	-5.99962	-2.82764	5/54	2069,6352,7039,89780,255324	EREG,CCL5,TGFA,WNT3A,EPGN
4_Member	Reactome Gene Sets	R-HSA-9634638	Estrogen-dependent nuclear events downstream of ESR-membrane signaling	-5.94193	-2.81479	4/24	595,2069,7039,255324	CCND1,EREG,TGFA,EPGN
4_Member	GO Biological Processes	GO:0051785	positive regulation of nuclear division	-5.80581	-2.76159	5/59	2069,3552,3553,7039,255324	EREG,IL1A,IL1B,TGFA,EPGN
4_Member	Reactome Gene Sets	R-HSA-5638302	Signaling by Overexpressed Wild-Type EGFR in Cancer	-5.71008	-2.76159	3/8	2069,7039,255324	EREG,TGFA,EPGN
4_Member	Reactome Gene Sets	R-HSA-5638303	Inhibition of Signaling by Overexpressed EGFR	-5.71008	-2.76159	3/8	2069,7039,255324	EREG,TGFA,EPGN
4_Member	Reactome Gene Sets	R-HSA-212718	EGFR interacts with phospholipase C-gamma	-5.53503	-2.67257	3/9	2069,7039,255324	EREG,TGFA,EPGN
4_Member	GO Biological Processes	GO:0001934	positive regulation of protein phosphorylation	-5.19566	-2.43865	12/741	595,923,1365,2069,3553,3624,3678,4915,6352,7039,89780,255324	CCND1,CD6,CLDN3,EREG,IL1B,INHBA,ITGA5,NTRK2,CCL5,TGFA,WNT3A,EPGN
4_Member	GO Biological Processes	GO:0045741	positive regulation of epidermal growth factor-activated receptor activity	-5.00713	-2.32182	3/13	2069,7039,255324	EREG,TGFA,EPGN
4_Member	Reactome Gene Sets	R-HSA-179812	GRB2 events in EGFR signaling	-5.00713	-2.32182	3/13	2069,7039,255324	EREG,TGFA,EPGN
4_Member	GO Biological Processes	GO:0061097	regulation of protein tyrosine kinase activity	-4.9213	-2.27138	5/89	2069,6352,7039,89780,255324	EREG,CCL5,TGFA,WNT3A,EPGN
4_Member	Reactome Gene Sets	R-HSA-180336	SHC1 events in EGFR signaling	-4.90344	-2.27138	3/14	2069,7039,255324	EREG,TGFA,EPGN
4_Member	Reactome Gene Sets	R-HSA-180292	GAB1 signalosome	-4.63518	-2.12436	3/17	2069,7039,255324	EREG,TGFA,EPGN
4_Member	GO Biological Processes	GO:0033674	positive regulation of kinase activity	-4.43474	-2.01095	9/489	595,2069,2263,3553,4915,6352,7039,89780,255324	CCND1,EREG,FGFR2,IL1B,NTRK2,CCL5,TGFA,WNT3A,EPGN
4_Member	GO Biological Processes	GO:0050731	positive regulation of peptidyl-tyrosine phosphorylation	-4.40407	-1.99251	6/188	2069,3678,6352,7039,89780,255324	EREG,ITGA5,CCL5,TGFA,WNT3A,EPGN
4_Member	GO Biological Processes	GO:0051302	regulation of cell division	-4.39121	-1.98762	6/189	2069,2263,3552,3553,5764,7039	EREG,FGFR2,IL1A,IL1B,PTN,TGFA
4_Member	GO Biological Processes	GO:0007088	regulation of mitotic nuclear division	-4.32939	-1.9498	5/118	2069,3552,3553,7039,255324	EREG,IL1A,IL1B,TGFA,EPGN
4_Member	GO Biological Processes	GO:0043549	regulation of kinase activity	-4.26256	-1.89221	11/778	595,2069,2263,3553,4915,6352,7039,81848,89780,94032,255324	CCND1,EREG,FGFR2,IL1B,NTRK2,CCL5,TGFA,SPRY4,WNT3A,CAMK2N2,EPGN
4_Member	GO Biological Processes	GO:0035239	tube morphogenesis	-4.14628	-1.80681	10/663	2069,2263,3037,3678,4915,7039,11082,55083,89780,255324	EREG,FGFR2,HAS2,ITGA5,NTRK2,TGFA,ESM1,KIF26B,WNT3A,EPGN
4_Member	Reactome Gene Sets	R-HSA-1643713	Signaling by EGFR in Cancer	-4.11432	-1.78328	3/25	2069,7039,255324	EREG,TGFA,EPGN
4_Member	GO Biological Processes	GO:0048514	blood vessel morphogenesis	-4.09033	-1.76345	8/421	2069,2263,3037,3678,4915,7039,11082,255324	EREG,FGFR2,HAS2,ITGA5,NTRK2,TGFA,ESM1,EPGN
4_Member	GO Biological Processes	GO:0009611	response to wounding	-3.99217	-1.71564	8/435	2069,2152,2263,3552,3678,6657,7039,89780	EREG,F3,FGFR2,IL1A,ITGA5,SOX2,TGFA,WNT3A
4_Member	GO Biological Processes	GO:0042060	wound healing	-3.93105	-1.67281	7/330	2069,2152,2263,3552,3678,7039,89780	EREG,F3,FGFR2,IL1A,ITGA5,TGFA,WNT3A
4_Member	GO Biological Processes	GO:0051783	regulation of nuclear division	-3.90554	-1.65784	5/145	2069,3552,3553,7039,255324	EREG,IL1A,IL1B,TGFA,EPGN
4_Member	GO Biological Processes	GO:0051347	positive regulation of transferase activity	-3.89806	-1.65783	9/575	595,2069,2263,3553,4915,6352,7039,89780,255324	CCND1,EREG,FGFR2,IL1B,NTRK2,CCL5,TGFA,WNT3A,EPGN
4_Member	Reactome Gene Sets	R-HSA-9009391	Extra-nuclear estrogen signaling	-3.89532	-1.65783	4/77	595,2069,7039,255324	CCND1,EREG,TGFA,EPGN
4_Member	Reactome Gene Sets	R-HSA-2219530	Constitutive Signaling by Aberrant PI3K in Cancer	-3.87355	-1.64524	4/78	2069,2263,7039,255324	EREG,FGFR2,TGFA,EPGN
4_Member	GO Biological Processes	GO:0007176	regulation of epidermal growth factor-activated receptor activity	-3.87274	-1.64524	3/30	2069,7039,255324	EREG,TGFA,EPGN
4_Member	Reactome Gene Sets	R-HSA-182971	EGFR downregulation	-3.82958	-1.61505	3/31	2069,7039,255324	EREG,TGFA,EPGN
4_Member	GO Biological Processes	GO:0045787	positive regulation of cell cycle	-3.7139	-1.52419	7/358	595,2069,2263,3552,3553,7039,255324	CCND1,EREG,FGFR2,IL1A,IL1B,TGFA,EPGN
4_Member	GO Biological Processes	GO:0050730	regulation of peptidyl-tyrosine phosphorylation	-3.65043	-1.48139	6/258	2069,3678,6352,7039,89780,255324	EREG,ITGA5,CCL5,TGFA,WNT3A,EPGN
4_Member	GO Biological Processes	GO:0090068	positive regulation of cell cycle process	-3.6414	-1.48139	6/259	595,2069,3552,3553,7039,255324	CCND1,EREG,IL1A,IL1B,TGFA,EPGN
4_Member	GO Biological Processes	GO:0045742	positive regulation of epidermal growth factor receptor signaling pathway	-3.63383	-1.48139	3/36	2069,7039,255324	EREG,TGFA,EPGN
4_Member	GO Biological Processes	GO:0050673	epithelial cell proliferation	-3.63356	-1.48139	4/90	595,2069,2263,7039	CCND1,EREG,FGFR2,TGFA
4_Member	GO Biological Processes	GO:1901186	positive regulation of ERBB signaling pathway	-3.56348	-1.43289	3/38	2069,7039,255324	EREG,TGFA,EPGN
4_Member	GO Biological Processes	GO:0001568	blood vessel development	-3.55196	-1.42399	8/505	2069,2263,3037,3678,4915,7039,11082,255324	EREG,FGFR2,HAS2,ITGA5,NTRK2,TGFA,ESM1,EPGN
4_Member	GO Biological Processes	GO:0045859	regulation of protein kinase activity	-3.45579	-1.36779	9/660	595,2069,3553,6352,7039,81848,89780,94032,255324	CCND1,EREG,IL1B,CCL5,TGFA,SPRY4,WNT3A,CAMK2N2,EPGN
4_Member	GO Biological Processes	GO:0001944	vasculature development	-3.43405	-1.34843	8/526	2069,2263,3037,3678,4915,7039,11082,255324	EREG,FGFR2,HAS2,ITGA5,NTRK2,TGFA,ESM1,EPGN
4_Member	Reactome Gene Sets	R-HSA-2219528	PI3K/AKT Signaling in Cancer	-3.39377	-1.32446	4/104	2069,2263,7039,255324	EREG,FGFR2,TGFA,EPGN
4_Member	GO Biological Processes	GO:0045860	positive regulation of protein kinase activity	-3.36517	-1.30423	7/409	595,2069,3553,6352,7039,89780,255324	CCND1,EREG,IL1B,CCL5,TGFA,WNT3A,EPGN
4_Member	Reactome Gene Sets	R-HSA-6811558	PI5P, PP2A and IER3 Regulate PI3K/AKT Signaling	-3.36239	-1.30423	4/106	2069,2263,7039,255324	EREG,FGFR2,TGFA,EPGN
4_Member	Reactome Gene Sets	R-HSA-8856825	Cargo recognition for clathrin-mediated endocytosis	-3.36239	-1.30423	4/106	915,2069,7039,255324	CD3D,EREG,TGFA,EPGN
4_Member	KEGG Pathway	hsa04010	MAPK signaling pathway	-3.34835	-1.29352	6/294	2069,2263,3552,3553,4915,7039	EREG,FGFR2,IL1A,IL1B,NTRK2,TGFA
4_Member	GO Biological Processes	GO:2000273	positive regulation of signaling receptor activity	-3.34493	-1.29352	3/45	2069,7039,255324	EREG,TGFA,EPGN
4_Member	Reactome Gene Sets	R-HSA-9006931	Signaling by Nuclear Receptors	-3.30978	-1.26706	6/299	216,220,595,2069,7039,255324	ALDH1A1,ALDH1A3,CCND1,EREG,TGFA,EPGN
4_Member	GO Biological Processes	GO:0007173	epidermal growth factor receptor signaling pathway	-3.26209	-1.23517	3/48	2069,7039,255324	EREG,TGFA,EPGN
4_Member	Reactome Gene Sets	R-HSA-199418	Negative regulation of the PI3K/AKT network	-3.25742	-1.23363	4/113	2069,2263,7039,255324	EREG,FGFR2,TGFA,EPGN
4_Member	Reactome Gene Sets	R-HSA-9006925	Intracellular signaling by second messengers	-3.23484	-1.21515	6/309	113,2069,2263,7039,255324,389541	ADCY7,EREG,FGFR2,TGFA,EPGN,LAMTOR4
4_Member	Reactome Gene Sets	R-HSA-177929	Signaling by EGFR	-3.20986	-1.19423	3/50	2069,7039,255324	EREG,TGFA,EPGN
4_Member	GO Biological Processes	GO:0001525	angiogenesis	-3.13453	-1.13281	6/323	2069,2263,3678,7039,11082,255324	EREG,FGFR2,ITGA5,TGFA,ESM1,EPGN
4_Member	GO Biological Processes	GO:0030879	mammary gland development	-3.11916	-1.12134	4/123	595,2263,7039,89780	CCND1,FGFR2,TGFA,WNT3A
4_Member	WikiPathways	WP4541	Hippo-Merlin signaling dysregulation	-3.11916	-1.12134	4/123	595,2263,3678,4915	CCND1,FGFR2,ITGA5,NTRK2
4_Member	GO Biological Processes	GO:0007167	enzyme-linked receptor protein signaling pathway	-3.03279	-1.05394	8/606	925,2069,2263,3624,4915,5764,7039,255324	CD8A,EREG,FGFR2,INHBA,NTRK2,PTN,TGFA,EPGN
4_Member	GO Biological Processes	GO:0038127	ERBB signaling pathway	-2.99947	-1.02798	3/59	2069,7039,255324	EREG,TGFA,EPGN
4_Member	KEGG Pathway	hsa04151	PI3K-Akt signaling pathway	-2.92952	-0.972389	6/354	595,2069,2263,3678,4915,7039	CCND1,EREG,FGFR2,ITGA5,NTRK2,TGFA
4_Member	GO Biological Processes	GO:0008283	cell population proliferation	-2.89612	-0.957985	7/492	595,2069,2263,6781,7039,9388,89780	CCND1,EREG,FGFR2,STC1,TGFA,LIPG,WNT3A
4_Member	Reactome Gene Sets	R-HSA-8856828	Clathrin-mediated endocytosis	-2.84314	-0.921576	4/146	915,2069,7039,255324	CD3D,EREG,TGFA,EPGN
4_Member	GO Biological Processes	GO:0007346	regulation of mitotic cell cycle	-2.77355	-0.874182	7/517	595,2069,3552,3553,3624,7039,255324	CCND1,EREG,IL1A,IL1B,INHBA,TGFA,EPGN
4_Member	Reactome Gene Sets	R-HSA-9006934	Signaling by Receptor Tyrosine Kinases	-2.75462	-0.859867	7/521	2069,2152,2263,4915,5764,7039,255324	EREG,F3,FGFR2,NTRK2,PTN,TGFA,EPGN
4_Member	GO Biological Processes	GO:0042058	regulation of epidermal growth factor receptor signaling pathway	-2.73225	-0.845541	3/73	2069,7039,255324	EREG,TGFA,EPGN
4_Member	KEGG Pathway	hsa05200	Pathways in cancer	-2.70808	-0.831306	7/531	113,595,2263,2938,4843,7039,89780	ADCY7,CCND1,FGFR2,GSTA1,NOS2,TGFA,WNT3A
4_Member	Reactome Gene Sets	R-HSA-1257604	PIP3 activates AKT signaling	-2.70357	-0.829713	5/267	2069,2263,7039,255324,389541	EREG,FGFR2,TGFA,EPGN,LAMTOR4
4_Member	GO Biological Processes	GO:0007169	transmembrane receptor protein tyrosine kinase signaling pathway	-2.63491	-0.780262	6/405	925,2069,2263,4915,7039,255324	CD8A,EREG,FGFR2,NTRK2,TGFA,EPGN
4_Member	GO Biological Processes	GO:1901184	regulation of ERBB signaling pathway	-2.63418	-0.780262	3/79	2069,7039,255324	EREG,TGFA,EPGN
4_Member	KEGG Pathway	hsa05225	Hepatocellular carcinoma	-2.62096	-0.772498	4/168	595,2938,7039,89780	CCND1,GSTA1,TGFA,WNT3A
4_Member	GO Biological Processes	GO:0010469	regulation of signaling receptor activity	-2.57501	-0.734793	4/173	131,2069,7039,255324	ADH7,EREG,TGFA,EPGN
4_Member	WikiPathways	WP4806	EGFR tyrosine kinase inhibitor resistance	-2.5584	-0.724878	3/84	595,2263,7039	CCND1,FGFR2,TGFA
4_Member	KEGG Pathway	hsa05210	Colorectal cancer	-2.52945	-0.705122	3/86	595,2069,7039	CCND1,EREG,TGFA
4_Member	GO Biological Processes	GO:0010564	regulation of cell cycle process	-2.51314	-0.692758	8/734	595,2069,3552,3553,3624,6657,7039,255324	CCND1,EREG,IL1A,IL1B,INHBA,SOX2,TGFA,EPGN
4_Member	GO Biological Processes	GO:0043405	regulation of MAP kinase activity	-2.48745	-0.674581	4/183	3553,7039,81848,255324	IL1B,TGFA,SPRY4,EPGN
4_Member	WikiPathways	WP673	ErbB signaling pathway	-2.46015	-0.656143	3/91	595,2069,7039	CCND1,EREG,TGFA
4_Member	KEGG Pathway	hsa05215	Prostate cancer	-2.38226	-0.600036	3/97	595,2263,7039	CCND1,FGFR2,TGFA
4_Member	WikiPathways	WP4172	PI3K-Akt signaling pathway	-2.23079	-0.482024	5/345	595,2263,3678,4915,7039	CCND1,FGFR2,ITGA5,NTRK2,TGFA
4_Member	Reactome Gene Sets	R-HSA-8939211	ESR-mediated signaling	-2.18494	-0.447528	4/223	595,2069,7039,255324	CCND1,EREG,TGFA,EPGN
4_Member	GO Biological Processes	GO:0071902	positive regulation of protein serine/threonine kinase activity	-2.1782	-0.442702	4/224	595,3553,7039,255324	CCND1,IL1B,TGFA,EPGN
4_Member	GO Biological Processes	GO:0043406	positive regulation of MAP kinase activity	-2.16658	-0.437605	3/116	3553,7039,255324	IL1B,TGFA,EPGN
4_Member	GO Biological Processes	GO:0001889	liver development	-2.1065	-0.390887	3/122	595,1373,7039	CCND1,CPS1,TGFA
4_Member	GO Biological Processes	GO:0050878	regulation of body fluid levels	-2.10119	-0.386585	5/371	358,595,2152,3037,89780	AQP1,CCND1,F3,HAS2,WNT3A
4_Member	GO Biological Processes	GO:0061008	hepaticobiliary system development	-2.07768	-0.369096	3/125	595,1373,7039	CCND1,CPS1,TGFA
4_Member	GO Biological Processes	GO:0071900	regulation of protein serine/threonine kinase activity	-2.02235	-0.323619	5/388	595,3553,7039,81848,255324	CCND1,IL1B,TGFA,SPRY4,EPGN
5_Summary	GO Biological Processes	GO:0060135	maternal process involved in female pregnancy	-5.84313	-2.76159	5/58	113,2706,3965,5764,6781,3553,3678,2263,4311	ADCY7,GJB2,LGALS9,PTN,STC1,IL1B,ITGA5,FGFR2,MME
5_Member	GO Biological Processes	GO:0060135	maternal process involved in female pregnancy	-5.84313	-2.76159	5/58	113,2706,3965,5764,6781	ADCY7,GJB2,LGALS9,PTN,STC1
5_Member	GO Biological Processes	GO:0007565	female pregnancy	-5.78725	-2.76159	7/170	113,2706,3553,3678,3965,5764,6781	ADCY7,GJB2,IL1B,ITGA5,LGALS9,PTN,STC1
5_Member	GO Biological Processes	GO:0044703	multi-organism reproductive process	-5.46671	-2.63716	7/190	113,2706,3553,3678,3965,5764,6781	ADCY7,GJB2,IL1B,ITGA5,LGALS9,PTN,STC1
5_Member	GO Biological Processes	GO:0044706	multi-multicellular organism process	-5.33431	-2.54255	7/199	113,2706,3553,3678,3965,5764,6781	ADCY7,GJB2,IL1B,ITGA5,LGALS9,PTN,STC1
5_Member	GO Biological Processes	GO:0046697	decidualization	-4.22574	-1.86444	3/23	2706,5764,6781	GJB2,PTN,STC1
5_Member	GO Biological Processes	GO:0001890	placenta development	-3.89154	-1.65741	5/146	2263,2706,4311,5764,6781	FGFR2,GJB2,MME,PTN,STC1
5_Member	GO Biological Processes	GO:0001893	maternal placenta development	-3.74752	-1.54867	3/33	2706,5764,6781	GJB2,PTN,STC1
6_Summary	GO Biological Processes	GO:0032103	positive regulation of response to external stimulus	-5.54918	-2.67257	10/455	1690,2069,2152,3553,3965,4068,5764,6352,114836,135250,4843,915,925,8140	COCH,EREG,F3,IL1B,LGALS9,SH2D1A,PTN,CCL5,SLAMF6,RAET1E,NOS2,CD3D,CD8A,SLC7A5
6_Member	GO Biological Processes	GO:0032103	positive regulation of response to external stimulus	-5.54918	-2.67257	10/455	1690,2069,2152,3553,3965,4068,5764,6352,114836,135250	COCH,EREG,F3,IL1B,LGALS9,SH2D1A,PTN,CCL5,SLAMF6,RAET1E
6_Member	GO Biological Processes	GO:0045089	positive regulation of innate immune response	-5.05885	-2.33403	6/144	1690,2069,4068,6352,114836,135250	COCH,EREG,SH2D1A,CCL5,SLAMF6,RAET1E
6_Member	GO Biological Processes	GO:0001910	regulation of leukocyte mediated cytotoxicity	-5.01899	-2.32182	5/85	3965,4068,4843,114836,135250	LGALS9,SH2D1A,NOS2,SLAMF6,RAET1E
6_Member	GO Biological Processes	GO:0045088	regulation of innate immune response	-4.85179	-2.23611	7/236	1690,2069,3965,4068,6352,114836,135250	COCH,EREG,LGALS9,SH2D1A,CCL5,SLAMF6,RAET1E
6_Member	GO Biological Processes	GO:0042269	regulation of natural killer cell mediated cytotoxicity	-4.77989	-2.1877	4/46	3965,4068,114836,135250	LGALS9,SH2D1A,SLAMF6,RAET1E
6_Member	GO Biological Processes	GO:0050778	positive regulation of immune response	-4.7172	-2.15445	10/567	915,925,1690,2069,3553,3965,4068,6352,114836,135250	CD3D,CD8A,COCH,EREG,IL1B,LGALS9,SH2D1A,CCL5,SLAMF6,RAET1E
6_Member	GO Biological Processes	GO:0002699	positive regulation of immune effector process	-4.7019	-2.14622	7/249	3553,3965,4068,4843,8140,114836,135250	IL1B,LGALS9,SH2D1A,NOS2,SLC7A5,SLAMF6,RAET1E
6_Member	GO Biological Processes	GO:0031341	regulation of cell killing	-4.6752	-2.12937	5/100	3965,4068,4843,114836,135250	LGALS9,SH2D1A,NOS2,SLAMF6,RAET1E
6_Member	GO Biological Processes	GO:0002715	regulation of natural killer cell mediated immunity	-4.63469	-2.12436	4/50	3965,4068,114836,135250	LGALS9,SH2D1A,SLAMF6,RAET1E
6_Member	GO Biological Processes	GO:0002831	regulation of response to biotic stimulus	-4.61069	-2.11723	8/355	1690,2069,3553,3965,4068,6352,114836,135250	COCH,EREG,IL1B,LGALS9,SH2D1A,CCL5,SLAMF6,RAET1E
6_Member	GO Biological Processes	GO:0002833	positive regulation of response to biotic stimulus	-4.44309	-2.01095	6/185	1690,2069,4068,6352,114836,135250	COCH,EREG,SH2D1A,CCL5,SLAMF6,RAET1E
6_Member	GO Biological Processes	GO:0001912	positive regulation of leukocyte mediated cytotoxicity	-4.37815	-1.98445	4/58	4068,4843,114836,135250	SH2D1A,NOS2,SLAMF6,RAET1E
6_Member	GO Biological Processes	GO:0031343	positive regulation of cell killing	-4.18289	-1.83482	4/65	4068,4843,114836,135250	SH2D1A,NOS2,SLAMF6,RAET1E
6_Member	GO Biological Processes	GO:0031349	positive regulation of defense response	-4.15262	-1.80887	7/304	1690,2069,3553,4068,6352,114836,135250	COCH,EREG,IL1B,SH2D1A,CCL5,SLAMF6,RAET1E
6_Member	GO Biological Processes	GO:0045954	positive regulation of natural killer cell mediated cytotoxicity	-4.01201	-1.71734	3/27	4068,114836,135250	SH2D1A,SLAMF6,RAET1E
6_Member	GO Biological Processes	GO:0002705	positive regulation of leukocyte mediated immunity	-4.00661	-1.71734	5/138	3553,4068,4843,114836,135250	IL1B,SH2D1A,NOS2,SLAMF6,RAET1E
6_Member	GO Biological Processes	GO:0002703	regulation of leukocyte mediated immunity	-3.85972	-1.6355	6/236	3553,3965,4068,4843,114836,135250	IL1B,LGALS9,SH2D1A,NOS2,SLAMF6,RAET1E
6_Member	GO Biological Processes	GO:0002717	positive regulation of natural killer cell mediated immunity	-3.78787	-1.57968	3/32	4068,114836,135250	SH2D1A,SLAMF6,RAET1E
6_Member	GO Biological Processes	GO:0002697	regulation of immune effector process	-3.72875	-1.53601	7/356	3553,3965,4068,4843,8140,114836,135250	IL1B,LGALS9,SH2D1A,NOS2,SLC7A5,SLAMF6,RAET1E
6_Member	GO Biological Processes	GO:0002706	regulation of lymphocyte mediated immunity	-3.52589	-1.41335	5/175	3553,3965,4068,114836,135250	IL1B,LGALS9,SH2D1A,SLAMF6,RAET1E
6_Member	GO Biological Processes	GO:0002708	positive regulation of lymphocyte mediated immunity	-3.20057	-1.18696	4/117	3553,4068,114836,135250	IL1B,SH2D1A,SLAMF6,RAET1E
6_Member	GO Biological Processes	GO:0031347	regulation of defense response	-2.78952	-0.883911	8/662	1690,2069,3553,3965,4068,6352,114836,135250	COCH,EREG,IL1B,LGALS9,SH2D1A,CCL5,SLAMF6,RAET1E
7_Summary	GO Biological Processes	GO:0045471	response to ethanol	-5.53662	-2.67257	6/119	113,131,595,939,1365,2263,3624,1462,3553,6352	ADCY7,ADH7,CCND1,CD27,CLDN3,FGFR2,INHBA,VCAN,IL1B,CCL5
7_Member	GO Biological Processes	GO:0045471	response to ethanol	-5.53662	-2.67257	6/119	113,131,595,939,1365,2263	ADCY7,ADH7,CCND1,CD27,CLDN3,FGFR2
7_Member	GO Biological Processes	GO:0097305	response to alcohol	-4.8164	-2.21372	7/239	113,131,595,939,1365,2263,3624	ADCY7,ADH7,CCND1,CD27,CLDN3,FGFR2,INHBA
7_Member	Canonical Pathways	M223	PID BETA CATENIN NUC PATHWAY	-2.61862	-0.771604	3/80	113,595,1462	ADCY7,CCND1,VCAN
7_Member	KEGG Pathway	hsa05163	Human cytomegalovirus infection	-2.17149	-0.440422	4/225	113,595,3553,6352	ADCY7,CCND1,IL1B,CCL5
8_Summary	KEGG Pathway	hsa04514	Cell adhesion molecules	-4.97413	-2.29816	6/149	914,923,925,1365,1462,201633,939,135250	CD2,CD6,CD8A,CLDN3,VCAN,TIGIT,CD27,RAET1E
8_Member	KEGG Pathway	hsa04514	Cell adhesion molecules	-4.97413	-2.29816	6/149	914,923,925,1365,1462,201633	CD2,CD6,CD8A,CLDN3,VCAN,TIGIT
8_Member	GO Biological Processes	GO:0002449	lymphocyte mediated immunity	-2.13198	-0.40922	4/231	914,925,939,135250	CD2,CD8A,CD27,RAET1E
9_Summary	GO Biological Processes	GO:0048608	reproductive structure development	-4.92867	-2.27138	9/423	595,2069,2263,2706,3624,4311,5764,6781,10409,3037,4843,4915,80045,10655,63950	CCND1,EREG,FGFR2,GJB2,INHBA,MME,PTN,STC1,BASP1,HAS2,NOS2,NTRK2,GPR157,DMRT2,DMRTA2
9_Member	GO Biological Processes	GO:0048608	reproductive structure development	-4.92867	-2.27138	9/423	595,2069,2263,2706,3624,4311,5764,6781,10409	CCND1,EREG,FGFR2,GJB2,INHBA,MME,PTN,STC1,BASP1
9_Member	GO Biological Processes	GO:0061458	reproductive system development	-4.90432	-2.27138	9/426	595,2069,2263,2706,3624,4311,5764,6781,10409	CCND1,EREG,FGFR2,GJB2,INHBA,MME,PTN,STC1,BASP1
9_Member	GO Biological Processes	GO:0048511	rhythmic process	-4.51859	-2.0634	7/266	2069,3037,3624,4843,4915,5764,80045	EREG,HAS2,INHBA,NOS2,NTRK2,PTN,GPR157
9_Member	GO Biological Processes	GO:0042698	ovulation cycle	-4.08114	-1.76245	4/69	2069,3037,3624,5764	EREG,HAS2,INHBA,PTN
9_Member	GO Biological Processes	GO:0007548	sex differentiation	-3.49374	-1.39118	6/276	595,2069,3624,10409,10655,63950	CCND1,EREG,INHBA,BASP1,DMRT2,DMRTA2
9_Member	GO Biological Processes	GO:0008406	gonad development	-2.20537	-0.460446	4/220	595,2069,3624,10409	CCND1,EREG,INHBA,BASP1
9_Member	GO Biological Processes	GO:0045137	development of primary sexual characteristics	-2.17149	-0.440422	4/225	595,2069,3624,10409	CCND1,EREG,INHBA,BASP1
10_Summary	GO Biological Processes	GO:0052547	regulation of peptidase activity	-4.67126	-2.12937	9/456	358,939,1365,2152,3965,6657,7078,8710,89780,3553,5764	AQP1,CD27,CLDN3,F3,LGALS9,SOX2,TIMP3,SERPINB7,WNT3A,IL1B,PTN
10_Member	GO Biological Processes	GO:0052547	regulation of peptidase activity	-4.67126	-2.12937	9/456	358,939,1365,2152,3965,6657,7078,8710,89780	AQP1,CD27,CLDN3,F3,LGALS9,SOX2,TIMP3,SERPINB7,WNT3A
10_Member	GO Biological Processes	GO:0043281	regulation of cysteine-type endopeptidase activity involved in apoptotic process	-4.20693	-1.85449	6/204	358,939,2152,3965,6657,89780	AQP1,CD27,F3,LGALS9,SOX2,WNT3A
10_Member	GO Biological Processes	GO:0052548	regulation of endopeptidase activity	-4.05484	-1.74816	8/426	358,939,2152,3965,6657,7078,8710,89780	AQP1,CD27,F3,LGALS9,SOX2,TIMP3,SERPINB7,WNT3A
10_Member	GO Biological Processes	GO:2000116	regulation of cysteine-type endopeptidase activity	-3.93097	-1.67281	6/229	358,939,2152,3965,6657,89780	AQP1,CD27,F3,LGALS9,SOX2,WNT3A
10_Member	GO Biological Processes	GO:0030162	regulation of proteolysis	-3.73346	-1.53768	10/745	358,939,1365,2152,3553,3965,6657,7078,8710,89780	AQP1,CD27,CLDN3,F3,IL1B,LGALS9,SOX2,TIMP3,SERPINB7,WNT3A
10_Member	GO Biological Processes	GO:1903036	positive regulation of response to wounding	-2.66595	-0.799323	3/77	1365,2152,5764	CLDN3,F3,PTN
10_Member	GO Biological Processes	GO:0010952	positive regulation of peptidase activity	-2.41317	-0.617771	4/192	1365,2152,3965,89780	CLDN3,F3,LGALS9,WNT3A
10_Member	GO Biological Processes	GO:0045862	positive regulation of proteolysis	-2.11076	-0.392094	5/369	1365,2152,3553,3965,89780	CLDN3,F3,IL1B,LGALS9,WNT3A
10_Member	GO Biological Processes	GO:0043280	positive regulation of cysteine-type endopeptidase activity involved in apoptotic process	-2.07768	-0.369096	3/125	2152,3965,89780	F3,LGALS9,WNT3A
11_Summary	GO Biological Processes	GO:0030855	epithelial cell differentiation	-4.65889	-2.12436	10/576	1365,1373,2069,2263,2938,3552,6781,8796,10409,23581,3624	CLDN3,CPS1,EREG,FGFR2,GSTA1,IL1A,STC1,SCEL,BASP1,CASP14,INHBA
11_Member	GO Biological Processes	GO:0030855	epithelial cell differentiation	-4.65889	-2.12436	10/576	1365,1373,2069,2263,2938,3552,6781,8796,10409,23581	CLDN3,CPS1,EREG,FGFR2,GSTA1,IL1A,STC1,SCEL,BASP1,CASP14
11_Member	GO Biological Processes	GO:0043588	skin development	-3.6414	-1.48139	6/259	2069,2263,3552,3624,8796,23581	EREG,FGFR2,IL1A,INHBA,SCEL,CASP14
11_Member	GO Biological Processes	GO:0008544	epidermis development	-3.27946	-1.24314	6/303	2069,2263,3552,3624,8796,23581	EREG,FGFR2,IL1A,INHBA,SCEL,CASP14
11_Member	GO Biological Processes	GO:0030216	keratinocyte differentiation	-2.96866	-1.00441	4/135	2069,3552,8796,23581	EREG,IL1A,SCEL,CASP14
11_Member	GO Biological Processes	GO:0009913	epidermal cell differentiation	-2.46224	-0.656143	4/186	2069,3552,8796,23581	EREG,IL1A,SCEL,CASP14
12_Summary	GO Biological Processes	GO:0030900	forebrain development	-4.4501	-2.01095	8/374	220,358,2263,3624,4915,6657,63950,89780,3678,595,2069,5764,6781,55083,1462,1373,7039,2706,22806,10409,114836,8796,85407,2201,10439,170689	ALDH1A3,AQP1,FGFR2,INHBA,NTRK2,SOX2,DMRTA2,WNT3A,ITGA5,CCND1,EREG,PTN,STC1,KIF26B,VCAN,CPS1,TGFA,GJB2,IKZF3,BASP1,SLAMF6,SCEL,NKD1,FBN2,OLFM1,ADAMTS15
12_Member	GO Biological Processes	GO:0030900	forebrain development	-4.4501	-2.01095	8/374	220,358,2263,3624,4915,6657,63950,89780	ALDH1A3,AQP1,FGFR2,INHBA,NTRK2,SOX2,DMRTA2,WNT3A
12_Member	GO Biological Processes	GO:0001704	formation of primary germ layer	-4.40107	-1.99251	5/114	2263,3624,3678,6657,89780	FGFR2,INHBA,ITGA5,SOX2,WNT3A
12_Member	GO Biological Processes	GO:0048333	mesodermal cell differentiation	-4.06212	-1.75147	3/26	2263,3624,89780	FGFR2,INHBA,WNT3A
12_Member	GO Biological Processes	GO:0021537	telencephalon development	-3.76197	-1.55691	6/246	220,358,3624,4915,63950,89780	ALDH1A3,AQP1,INHBA,NTRK2,DMRTA2,WNT3A
12_Member	WikiPathways	WP2839	Hair follicle development: organogenesis - part 2 of 3	-3.74752	-1.54867	3/33	595,2263,3624	CCND1,FGFR2,INHBA
12_Member	GO Biological Processes	GO:0007369	gastrulation	-3.69332	-1.51551	5/161	2263,3624,3678,6657,89780	FGFR2,INHBA,ITGA5,SOX2,WNT3A
12_Member	GO Biological Processes	GO:0040007	growth	-3.60555	-1.467	7/373	2069,2263,5764,6657,6781,55083,89780	EREG,FGFR2,PTN,SOX2,STC1,KIF26B,WNT3A
12_Member	GO Biological Processes	GO:0048589	developmental growth	-3.60555	-1.467	7/373	2069,2263,5764,6657,6781,55083,89780	EREG,FGFR2,PTN,SOX2,STC1,KIF26B,WNT3A
12_Member	GO Biological Processes	GO:0001503	ossification	-3.51903	-1.4112	6/273	1462,2263,5764,6657,6781,89780	VCAN,FGFR2,PTN,SOX2,STC1,WNT3A
12_Member	GO Biological Processes	GO:0048732	gland development	-3.4099	-1.33599	7/402	220,595,1373,2263,6657,7039,89780	ALDH1A3,CCND1,CPS1,FGFR2,SOX2,TGFA,WNT3A
12_Member	GO Biological Processes	GO:0048839	inner ear development	-3.36227	-1.30423	5/190	220,2263,2706,6657,89780	ALDH1A3,FGFR2,GJB2,SOX2,WNT3A
12_Member	GO Biological Processes	GO:0032526	response to retinoic acid	-3.31651	-1.27164	4/109	358,2263,2706,89780	AQP1,FGFR2,GJB2,WNT3A
12_Member	GO Biological Processes	GO:0021872	forebrain generation of neurons	-3.26209	-1.23517	3/48	2263,3624,89780	FGFR2,INHBA,WNT3A
12_Member	GO Biological Processes	GO:0007498	mesoderm development	-3.10601	-1.11205	4/124	2263,3624,22806,89780	FGFR2,INHBA,IKZF3,WNT3A
12_Member	GO Biological Processes	GO:0043583	ear development	-3.10132	-1.10928	5/217	220,2263,2706,6657,89780	ALDH1A3,FGFR2,GJB2,SOX2,WNT3A
12_Member	GO Biological Processes	GO:0007420	brain development	-3.08374	-1.0936	9/744	220,358,2263,3624,4915,6657,10409,63950,89780	ALDH1A3,AQP1,FGFR2,INHBA,NTRK2,SOX2,BASP1,DMRTA2,WNT3A
12_Member	GO Biological Processes	GO:0060322	head development	-2.90594	-0.964408	9/789	220,358,2263,3624,4915,6657,10409,63950,89780	ALDH1A3,AQP1,FGFR2,INHBA,NTRK2,SOX2,BASP1,DMRTA2,WNT3A
12_Member	KEGG Pathway	hsa04550	Signaling pathways regulating pluripotency of stem cells	-2.8763	-0.942535	4/143	2263,3624,6657,89780	FGFR2,INHBA,SOX2,WNT3A
12_Member	GO Biological Processes	GO:0045165	cell fate commitment	-2.87485	-0.942535	5/244	2263,6657,63950,89780,114836	FGFR2,SOX2,DMRTA2,WNT3A,SLAMF6
12_Member	GO Biological Processes	GO:0030177	positive regulation of Wnt signaling pathway	-2.86516	-0.938696	4/144	2263,8796,85407,89780	FGFR2,SCEL,NKD1,WNT3A
12_Member	GO Biological Processes	GO:0071300	cellular response to retinoic acid	-2.83941	-0.921089	3/67	358,2263,89780	AQP1,FGFR2,WNT3A
12_Member	GO Biological Processes	GO:0001707	mesoderm formation	-2.82085	-0.909707	3/68	2263,3624,89780	FGFR2,INHBA,WNT3A
12_Member	GO Biological Processes	GO:0048332	mesoderm morphogenesis	-2.7846	-0.883686	3/70	2263,3624,89780	FGFR2,INHBA,WNT3A
12_Member	GO Biological Processes	GO:0060828	regulation of canonical Wnt signaling pathway	-2.74655	-0.854848	5/261	2263,6657,8796,85407,89780	FGFR2,SOX2,SCEL,NKD1,WNT3A
12_Member	GO Biological Processes	GO:0021953	central nervous system neuron differentiation	-2.63977	-0.781658	4/166	2263,3624,4915,89780	FGFR2,INHBA,NTRK2,WNT3A
12_Member	GO Biological Processes	GO:0048729	tissue morphogenesis	-2.59208	-0.747804	7/557	220,2263,3624,3678,6781,55083,89780	ALDH1A3,FGFR2,INHBA,ITGA5,STC1,KIF26B,WNT3A
12_Member	GO Biological Processes	GO:0030901	midbrain development	-2.54383	-0.716899	3/85	2263,10409,89780	FGFR2,BASP1,WNT3A
12_Member	GO Biological Processes	GO:0048598	embryonic morphogenesis	-2.51157	-0.692758	7/576	220,2201,2263,3624,3678,6657,89780	ALDH1A3,FBN2,FGFR2,INHBA,ITGA5,SOX2,WNT3A
12_Member	GO Biological Processes	GO:0042472	inner ear morphogenesis	-2.32127	-0.550693	3/102	220,2263,89780	ALDH1A3,FGFR2,WNT3A
12_Member	GO Biological Processes	GO:0048638	regulation of developmental growth	-2.31662	-0.548329	5/329	2263,10409,10439,85407,89780	FGFR2,BASP1,OLFM1,NKD1,WNT3A
12_Member	GO Biological Processes	GO:0030111	regulation of Wnt signaling pathway	-2.27846	-0.520338	5/336	2263,6657,8796,85407,89780	FGFR2,SOX2,SCEL,NKD1,WNT3A
12_Member	GO Biological Processes	GO:0021761	limbic system development	-2.26348	-0.508694	3/107	220,2263,89780	ALDH1A3,FGFR2,WNT3A
12_Member	GO Biological Processes	GO:0061061	muscle structure development	-2.2582	-0.504518	6/484	2263,10409,63950,85407,89780,170689	FGFR2,BASP1,DMRTA2,NKD1,WNT3A,ADAMTS15
12_Member	GO Biological Processes	GO:0090263	positive regulation of canonical Wnt signaling pathway	-2.24119	-0.490813	3/109	2263,8796,89780	FGFR2,SCEL,WNT3A
12_Member	GO Biological Processes	GO:0060560	developmental growth involved in morphogenesis	-2.14618	-0.422391	3/118	2263,55083,89780	FGFR2,KIF26B,WNT3A
12_Member	GO Biological Processes	GO:0042476	odontogenesis	-2.11628	-0.396601	3/121	358,2263,3624	AQP1,FGFR2,INHBA
12_Member	GO Biological Processes	GO:0042471	ear morphogenesis	-2.1065	-0.390887	3/122	220,2263,89780	ALDH1A3,FGFR2,WNT3A
12_Member	GO Biological Processes	GO:0001649	osteoblast differentiation	-2.01333	-0.3204	3/132	1462,6657,89780	VCAN,SOX2,WNT3A
13_Summary	GO Biological Processes	GO:0007159	leukocyte cell-cell adhesion	-4.43858	-2.01095	4/56	3553,3678,4973,6352,914,2152,4843,7078,7975,8140,29802,55083,923,1365,5098,89780	IL1B,ITGA5,OLR1,CCL5,CD2,F3,NOS2,TIMP3,MAFK,SLC7A5,VPREB3,KIF26B,CD6,CLDN3,PCDHGC3,WNT3A
13_Member	GO Biological Processes	GO:0007159	leukocyte cell-cell adhesion	-4.43858	-2.01095	4/56	3553,3678,4973,6352	IL1B,ITGA5,OLR1,CCL5
13_Member	Reactome Gene Sets	R-HSA-109582	Hemostasis	-4.38289	-1.98445	10/621	914,2152,3678,4843,4973,7078,7975,8140,29802,55083	CD2,F3,ITGA5,NOS2,OLR1,TIMP3,MAFK,SLC7A5,VPREB3,KIF26B
13_Member	GO Biological Processes	GO:0098609	cell-cell adhesion	-4.12246	-1.78722	9/537	914,923,1365,3553,3678,4973,5098,6352,89780	CD2,CD6,CLDN3,IL1B,ITGA5,OLR1,PCDHGC3,CCL5,WNT3A
13_Member	Reactome Gene Sets	R-HSA-202733	Cell surface interactions at the vascular wall	-4.0215	-1.71875	5/137	914,3678,4973,8140,29802	CD2,ITGA5,OLR1,SLC7A5,VPREB3
14_Summary	Canonical Pathways	M5884	NABA CORE MATRISOME	-4.42679	-2.00814	7/275	1462,1690,2201,4148,10631,11082,84624,3678,7177	VCAN,COCH,FBN2,MATN3,POSTN,ESM1,FNDC1,ITGA5,TPSAB1
14_Member	Canonical Pathways	M5884	NABA CORE MATRISOME	-4.42679	-2.00814	7/275	1462,1690,2201,4148,10631,11082,84624	VCAN,COCH,FBN2,MATN3,POSTN,ESM1,FNDC1
14_Member	Canonical Pathways	M3008	NABA ECM GLYCOPROTEINS	-3.30082	-1.26025	5/196	1690,2201,4148,10631,84624	COCH,FBN2,MATN3,POSTN,FNDC1
14_Member	Reactome Gene Sets	R-HSA-1474244	Extracellular matrix organization	-2.47962	-0.669367	5/301	1462,2201,3678,4148,7177	VCAN,FBN2,ITGA5,MATN3,TPSAB1
15_Summary	GO Biological Processes	GO:0010817	regulation of hormone levels	-4.37348	-1.98445	9/498	131,216,220,3553,3624,4843,6352,8140,54097,358,595,4915,9783,55244,3965,7078,10439	ADH7,ALDH1A1,ALDH1A3,IL1B,INHBA,NOS2,CCL5,SLC7A5,FAM3B,AQP1,CCND1,NTRK2,RIMS3,SLC47A1,LGALS9,TIMP3,OLFM1
15_Member	GO Biological Processes	GO:0010817	regulation of hormone levels	-4.37348	-1.98445	9/498	131,216,220,3553,3624,4843,6352,8140,54097	ADH7,ALDH1A1,ALDH1A3,IL1B,INHBA,NOS2,CCL5,SLC7A5,FAM3B
15_Member	GO Biological Processes	GO:0046903	secretion	-3.63987	-1.48139	8/490	358,595,3624,4843,4915,6352,9783,54097	AQP1,CCND1,INHBA,NOS2,NTRK2,CCL5,RIMS3,FAM3B
15_Member	GO Biological Processes	GO:0140352	export from cell	-3.21848	-1.20082	7/433	3624,4843,4915,6352,9783,54097,55244	INHBA,NOS2,NTRK2,CCL5,RIMS3,FAM3B,SLC47A1
15_Member	GO Biological Processes	GO:0032940	secretion by cell	-2.78493	-0.883686	6/378	3624,4843,4915,6352,9783,54097	INHBA,NOS2,NTRK2,CCL5,RIMS3,FAM3B
15_Member	GO Biological Processes	GO:0023061	signal release	-2.71765	-0.835595	4/158	3624,4843,9783,54097	INHBA,NOS2,RIMS3,FAM3B
15_Member	GO Biological Processes	GO:0043068	positive regulation of programmed cell death	-2.65368	-0.789022	7/543	220,3624,3965,4843,6352,7078,10439	ALDH1A3,INHBA,LGALS9,NOS2,CCL5,TIMP3,OLFM1
15_Member	GO Biological Processes	GO:0009914	hormone transport	-2.54383	-0.716899	3/85	3624,8140,54097	INHBA,SLC7A5,FAM3B
15_Member	GO Biological Processes	GO:0010942	positive regulation of cell death	-2.39504	-0.605507	7/605	220,3624,3965,4843,6352,7078,10439	ALDH1A3,INHBA,LGALS9,NOS2,CCL5,TIMP3,OLFM1
15_Member	GO Biological Processes	GO:0043065	positive regulation of apoptotic process	-2.07665	-0.369064	6/529	220,3624,3965,6352,7078,10439	ALDH1A3,INHBA,LGALS9,CCL5,TIMP3,OLFM1
16_Summary	GO Biological Processes	GO:0060284	regulation of cell development	-4.35336	-1.96907	9/501	3037,3552,3553,4311,4915,5764,63950,81848,89780,595,2069,3624,6657,29909,1365,2263,3965,9783	HAS2,IL1A,IL1B,MME,NTRK2,PTN,DMRTA2,SPRY4,WNT3A,CCND1,EREG,INHBA,SOX2,GPR171,CLDN3,FGFR2,LGALS9,RIMS3
16_Member	GO Biological Processes	GO:0060284	regulation of cell development	-4.35336	-1.96907	9/501	3037,3552,3553,4311,4915,5764,63950,81848,89780	HAS2,IL1A,IL1B,MME,NTRK2,PTN,DMRTA2,SPRY4,WNT3A
16_Member	GO Biological Processes	GO:0010720	positive regulation of cell development	-4.216	-1.85915	7/297	3037,3553,4311,4915,5764,63950,89780	HAS2,IL1B,MME,NTRK2,PTN,DMRTA2,WNT3A
16_Member	GO Biological Processes	GO:0050769	positive regulation of neurogenesis	-4.00471	-1.71734	6/222	3553,4311,4915,5764,63950,89780	IL1B,MME,NTRK2,PTN,DMRTA2,WNT3A
16_Member	GO Biological Processes	GO:0045596	negative regulation of cell differentiation	-3.95764	-1.68512	10/699	595,2069,3552,3553,3624,5764,6657,29909,81848,89780	CCND1,EREG,IL1A,IL1B,INHBA,PTN,SOX2,GPR171,SPRY4,WNT3A
16_Member	GO Biological Processes	GO:0051962	positive regulation of nervous system development	-3.54464	-1.41928	6/270	3553,4311,4915,5764,63950,89780	IL1B,MME,NTRK2,PTN,DMRTA2,WNT3A
16_Member	GO Biological Processes	GO:0010721	negative regulation of cell development	-3.45863	-1.36815	5/181	3552,3553,5764,81848,89780	IL1A,IL1B,PTN,SPRY4,WNT3A
16_Member	GO Biological Processes	GO:0008285	negative regulation of cell population proliferation	-2.91738	-0.968326	9/786	1365,2069,2263,3552,3553,3624,3965,5764,6657	CLDN3,EREG,FGFR2,IL1A,IL1B,INHBA,LGALS9,PTN,SOX2
16_Member	GO Biological Processes	GO:0050767	regulation of neurogenesis	-2.86789	-0.938696	6/364	3553,4311,4915,5764,63950,89780	IL1B,MME,NTRK2,PTN,DMRTA2,WNT3A
16_Member	GO Biological Processes	GO:2000177	regulation of neural precursor cell proliferation	-2.54383	-0.716899	3/85	5764,63950,89780	PTN,DMRTA2,WNT3A
16_Member	GO Biological Processes	GO:0050804	modulation of chemical synaptic transmission	-2.48191	-0.670395	6/435	3553,4311,4915,5764,9783,89780	IL1B,MME,NTRK2,PTN,RIMS3,WNT3A
16_Member	GO Biological Processes	GO:0099177	regulation of trans-synaptic signaling	-2.47703	-0.668038	6/436	3553,4311,4915,5764,9783,89780	IL1B,MME,NTRK2,PTN,RIMS3,WNT3A
16_Member	GO Biological Processes	GO:0051960	regulation of nervous system development	-2.44329	-0.641764	6/443	3553,4311,4915,5764,63950,89780	IL1B,MME,NTRK2,PTN,DMRTA2,WNT3A
16_Member	GO Biological Processes	GO:1901888	regulation of cell junction assembly	-2.33517	-0.559972	4/202	1365,3553,4915,89780	CLDN3,IL1B,NTRK2,WNT3A
16_Member	GO Biological Processes	GO:0048167	regulation of synaptic plasticity	-2.3201	-0.55067	4/204	4311,4915,5764,9783	MME,NTRK2,PTN,RIMS3
17_Summary	GO Biological Processes	GO:0009410	response to xenobiotic stimulus	-4.23741	-1.87161	8/401	218,595,1373,2938,3553,3624,4843,7039,131,8140,216	ALDH3A1,CCND1,CPS1,GSTA1,IL1B,INHBA,NOS2,TGFA,ADH7,SLC7A5,ALDH1A1
17_Member	GO Biological Processes	GO:0009410	response to xenobiotic stimulus	-4.23741	-1.87161	8/401	218,595,1373,2938,3553,3624,4843,7039	ALDH3A1,CCND1,CPS1,GSTA1,IL1B,INHBA,NOS2,TGFA
17_Member	WikiPathways	WP2882	Nuclear receptors meta-pathway	-3.99703	-1.71564	7/322	131,218,595,2938,3553,7039,8140	ADH7,ALDH3A1,CCND1,GSTA1,IL1B,TGFA,SLC7A5
17_Member	WikiPathways	WP2873	Aryl hydrocarbon receptor pathway	-3.26209	-1.23517	3/48	218,3553,8140	ALDH3A1,IL1B,SLC7A5
17_Member	WikiPathways	WP2884	NRF2 pathway	-2.84314	-0.921576	4/146	131,218,2938,7039	ADH7,ALDH3A1,GSTA1,TGFA
17_Member	KEGG Pathway	hsa00982	Drug metabolism - cytochrome P450	-2.74944	-0.856215	3/72	131,218,2938	ADH7,ALDH3A1,GSTA1
17_Member	KEGG Pathway	hsa00980	Metabolism of xenobiotics by cytochrome P450	-2.64996	-0.789022	3/78	131,218,2938	ADH7,ALDH3A1,GSTA1
17_Member	GO Biological Processes	GO:0071466	cellular response to xenobiotic stimulus	-2.62096	-0.772498	4/168	218,2938,3553,4843	ALDH3A1,GSTA1,IL1B,NOS2
17_Member	Reactome Gene Sets	R-HSA-211945	Phase I - Functionalization of compounds	-2.2748	-0.517791	3/106	131,216,218	ADH7,ALDH1A1,ALDH3A1
17_Member	Reactome Gene Sets	R-HSA-211859	Biological oxidations	-2.19171	-0.451098	4/222	131,216,218,2938	ADH7,ALDH1A1,ALDH3A1,GSTA1
18_Summary	Reactome Gene Sets	R-HSA-198933	Immunoregulatory interactions between a Lymphoid and a non-Lymphoid cell	-4.06691	-1.75226	5/134	915,925,4068,114836,135250,914,923,3553,6352,22806,89780,939,27240,2263,3624,3965	CD3D,CD8A,SH2D1A,SLAMF6,RAET1E,CD2,CD6,IL1B,CCL5,IKZF3,WNT3A,CD27,SIT1,FGFR2,INHBA,LGALS9
18_Member	Reactome Gene Sets	R-HSA-198933	Immunoregulatory interactions between a Lymphoid and a non-Lymphoid cell	-4.06691	-1.75226	5/134	915,925,4068,114836,135250	CD3D,CD8A,SH2D1A,SLAMF6,RAET1E
18_Member	GO Biological Processes	GO:0001775	cell activation	-3.51872	-1.4112	9/647	914,915,923,925,3553,6352,22806,89780,114836	CD2,CD3D,CD6,CD8A,IL1B,CCL5,IKZF3,WNT3A,SLAMF6
18_Member	WikiPathways	WP5072	Modulators of TCR signaling and T cell activation	-2.95737	-0.994909	3/61	915,925,4068	CD3D,CD8A,SH2D1A
18_Member	GO Biological Processes	GO:0045321	leukocyte activation	-2.73121	-0.845541	7/526	914,915,923,925,6352,22806,114836	CD2,CD3D,CD6,CD8A,CCL5,IKZF3,SLAMF6
18_Member	GO Biological Processes	GO:0046649	lymphocyte activation	-2.57209	-0.734568	6/417	914,915,923,925,22806,114836	CD2,CD3D,CD6,CD8A,IKZF3,SLAMF6
18_Member	GO Biological Processes	GO:0002250	adaptive immune response	-2.30395	-0.537938	7/629	915,923,925,939,4068,27240,114836	CD3D,CD6,CD8A,CD27,SH2D1A,SIT1,SLAMF6
18_Member	GO Biological Processes	GO:0002520	immune system development	-2.06251	-0.359864	7/699	915,925,2263,3624,3965,89780,114836	CD3D,CD8A,FGFR2,INHBA,LGALS9,WNT3A,SLAMF6
19_Summary	GO Biological Processes	GO:0007423	sensory organ development	-4.01385	-1.71734	9/555	220,2201,2263,2706,3624,4915,6657,85407,89780	ALDH1A3,FBN2,FGFR2,GJB2,INHBA,NTRK2,SOX2,NKD1,WNT3A
19_Member	GO Biological Processes	GO:0007423	sensory organ development	-4.01385	-1.71734	9/555	220,2201,2263,2706,3624,4915,6657,85407,89780	ALDH1A3,FBN2,FGFR2,GJB2,INHBA,NTRK2,SOX2,NKD1,WNT3A
19_Member	GO Biological Processes	GO:0090596	sensory organ morphogenesis	-3.61455	-1.4706	6/262	220,2201,2263,4915,85407,89780	ALDH1A3,FBN2,FGFR2,NTRK2,NKD1,WNT3A
19_Member	GO Biological Processes	GO:0001654	eye development	-2.84381	-0.921576	6/368	220,2201,3624,4915,6657,85407	ALDH1A3,FBN2,INHBA,NTRK2,SOX2,NKD1
19_Member	GO Biological Processes	GO:0150063	visual system development	-2.82003	-0.909707	6/372	220,2201,3624,4915,6657,85407	ALDH1A3,FBN2,INHBA,NTRK2,SOX2,NKD1
19_Member	GO Biological Processes	GO:0048592	eye morphogenesis	-2.7895	-0.883911	4/151	220,2201,4915,85407	ALDH1A3,FBN2,NTRK2,NKD1
19_Member	GO Biological Processes	GO:0048880	sensory system development	-2.78493	-0.883686	6/378	220,2201,3624,4915,6657,85407	ALDH1A3,FBN2,INHBA,NTRK2,SOX2,NKD1
20_Summary	GO Biological Processes	GO:0051384	response to glucocorticoid	-3.99183	-1.71564	5/139	358,595,1373,2706,6781,3552,9388,10631,3553,2069,3624,4843,7078,6352,113	AQP1,CCND1,CPS1,GJB2,STC1,IL1A,LIPG,POSTN,IL1B,EREG,INHBA,NOS2,TIMP3,CCL5,ADCY7
20_Member	GO Biological Processes	GO:0051384	response to glucocorticoid	-3.99183	-1.71564	5/139	358,595,1373,2706,6781	AQP1,CCND1,CPS1,GJB2,STC1
20_Member	GO Biological Processes	GO:0007584	response to nutrient	-3.91964	-1.66622	5/144	595,3552,6781,9388,10631	CCND1,IL1A,STC1,LIPG,POSTN
20_Member	GO Biological Processes	GO:0033273	response to vitamin	-3.89532	-1.65783	4/77	595,3552,6781,10631	CCND1,IL1A,STC1,POSTN
20_Member	GO Biological Processes	GO:0031960	response to corticosteroid	-3.69332	-1.51551	5/161	358,595,1373,2706,6781	AQP1,CCND1,CPS1,GJB2,STC1
20_Member	GO Biological Processes	GO:0071548	response to dexamethasone	-3.46498	-1.36976	3/41	358,1373,2706	AQP1,CPS1,GJB2
20_Member	GO Biological Processes	GO:1901654	response to ketone	-3.32107	-1.27403	5/194	358,595,1373,2706,10631	AQP1,CCND1,CPS1,GJB2,POSTN
20_Member	GO Biological Processes	GO:0071385	cellular response to glucocorticoid stimulus	-3.13554	-1.13281	3/53	358,2706,6781	AQP1,GJB2,STC1
20_Member	GO Biological Processes	GO:0071320	cellular response to cAMP	-3.11176	-1.11587	3/54	358,1373,6781	AQP1,CPS1,STC1
20_Member	GO Biological Processes	GO:0046683	response to organophosphorus	-3.08007	-1.09183	4/126	358,1373,3553,6781	AQP1,CPS1,IL1B,STC1
20_Member	GO Biological Processes	GO:0009725	response to hormone	-3.04708	-1.06449	9/753	358,595,1373,2069,2706,3624,4843,6781,7078	AQP1,CCND1,CPS1,EREG,GJB2,INHBA,NOS2,STC1,TIMP3
20_Member	GO Biological Processes	GO:0071384	cellular response to corticosteroid stimulus	-2.91672	-0.968326	3/63	358,2706,6781	AQP1,GJB2,STC1
20_Member	GO Biological Processes	GO:0014074	response to purine-containing compound	-2.91025	-0.967016	4/140	358,1373,3553,6781	AQP1,CPS1,IL1B,STC1
20_Member	GO Biological Processes	GO:0071407	cellular response to organic cyclic compound	-2.83144	-0.916342	7/505	358,1373,2706,3553,3624,6352,6781	AQP1,CPS1,GJB2,IL1B,INHBA,CCL5,STC1
20_Member	GO Biological Processes	GO:0048545	response to steroid hormone	-2.64116	-0.781658	5/276	358,595,1373,2706,6781	AQP1,CCND1,CPS1,GJB2,STC1
20_Member	GO Biological Processes	GO:0051591	response to cAMP	-2.48736	-0.674581	3/89	358,1373,6781	AQP1,CPS1,STC1
20_Member	GO Biological Processes	GO:0031667	response to nutrient levels	-2.42903	-0.629966	6/446	595,1373,3552,6781,9388,10631	CCND1,CPS1,IL1A,STC1,LIPG,POSTN
20_Member	GO Biological Processes	GO:1901655	cellular response to ketone	-2.36979	-0.589922	3/98	358,2706,10631	AQP1,GJB2,POSTN
20_Member	GO Biological Processes	GO:0009991	response to extracellular stimulus	-2.27969	-0.520454	6/479	595,1373,3552,6781,9388,10631	CCND1,CPS1,IL1A,STC1,LIPG,POSTN
20_Member	GO Biological Processes	GO:0010038	response to metal ion	-2.19984	-0.456836	5/351	113,358,595,1373,3552	ADCY7,AQP1,CCND1,CPS1,IL1A
